# Supplementary material for: Targeting APLN/APJ restores blood-testis barrier and improves spermatogenesis in murine and human diabetic models
Source: PubMed Central journal article supplement (PMC9705293; doi:10.1038/s41467-022-34990-3), 2022-11-28
Supplement: 41467_2022_34990_MOESM1_ESM.pdf [file 41467_2022_34990_MOESM1_ESM.pdf]

## **Supplementary Information**

### **Targeting APLN/APJ restores blood-testis barrier and improves spermatogenesis in murine and human diabetic models**

Ke Song, Xinyan Yang, Geng An, Xinyu Xia, Jiexiang Zhao, Xiaoheng Xu, Cong Wan, Tianyuan Liu, Yi Zheng, Shaofang Ren, Mei Wang, Gang Chang, Shane J.F. Cronin, Josef M. Penninger, Tao Jing, Xianghong Ou, Shuan Rao, Zhaoting Liu, Xiao-Yang Zhao

\*Corresponding authors: Shuan Rao ([raoshuan1@smu.edu.cn](mailto:raoshuan1@smu.edu.cn)), Zhaoting Liu ([liuzhaoting@i.smu.edu.cn](mailto:liuzhaoting@i.smu.edu.cn)), Xiao-Yang Zhao ([zhaoxiaoyang@smu.edu.cn](mailto:zhaoxiaoyang@smu.edu.cn)).

#### **Contents for Supporting Information**

##### **I. Supplementary Figures**

**a**

| Batch | Type | Age of donor | Strategy | Cell Number (After QC: 900) |
|-------|------|--------------|----------|-----------------------------|
| DM1   | T2DM | 42           | Random   | 441                         |
| DM2   | T2DM | 34           | Random   | 459                         |

**b**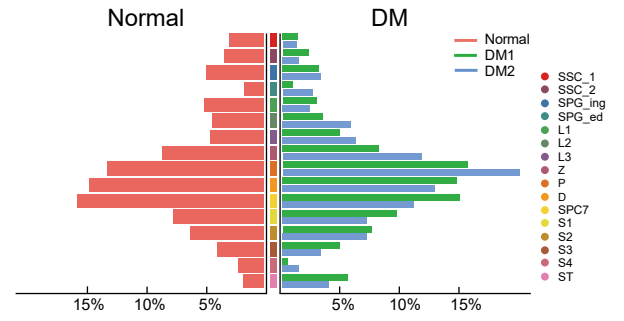**c**

|        | SSC_1 | SSC_2 | SPG_ing | SPG_ed | L1  | L2  | L3  | Z   | P   | D   | SPC7 | S1  | S2  | S3 | S4 | ST | LD | T   |
|--------|-------|-------|---------|--------|-----|-----|-----|-----|-----|-----|------|-----|-----|----|----|----|----|-----|
| Normal | 74    | 85    | 122     | 42     | 128 | 109 | 114 | 216 | 332 | 370 | 396  | 192 | 156 | 99 | 54 | 43 | 91 | 187 |
| DM1    | 5     | 6     | 14      | 11     | 10  | 25  | 27  | 51  | 87  | 56  | 47   | 31  | 31  | 14 | 6  | 17 | 3  | NA  |
| DM2    | 6     | 10    | 14      | 4      | 13  | 19  | 22  | 37  | 71  | 67  | 68   | 44  | 34  | 22 | 2  | 25 | 1  | NA  |

**d**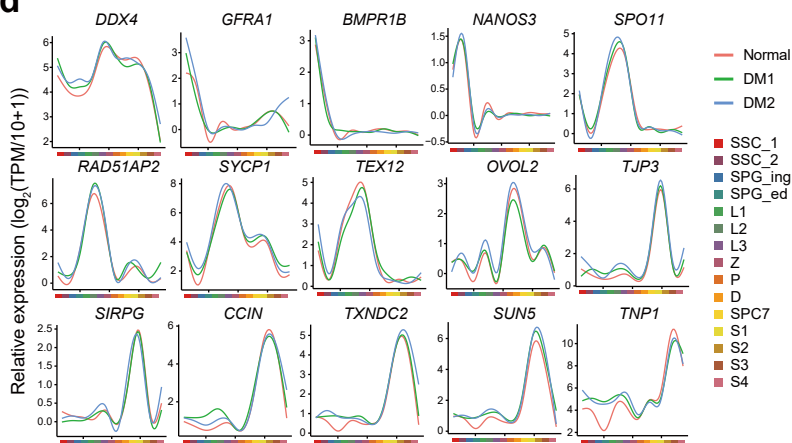**e**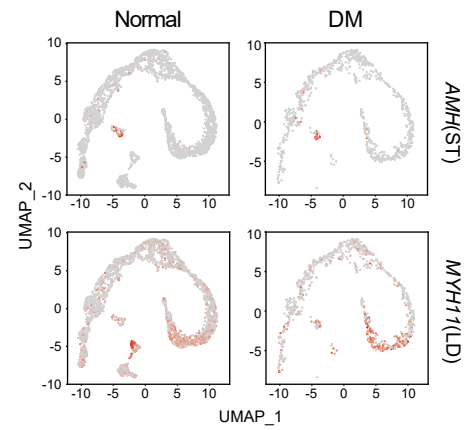**f**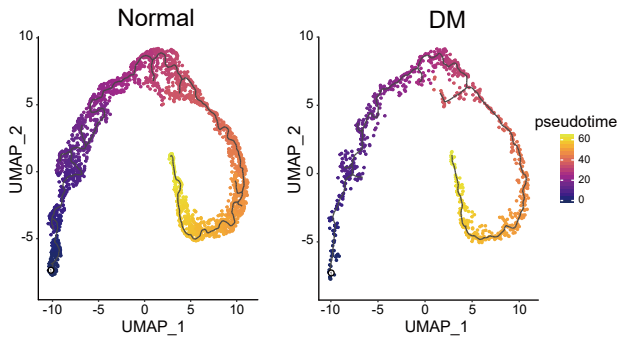**g**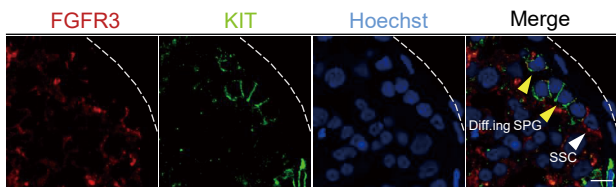**h**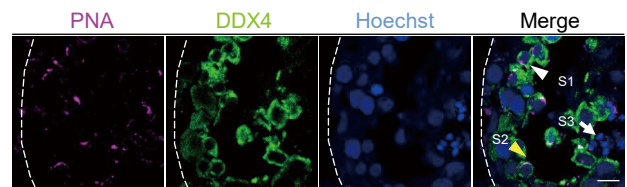**i**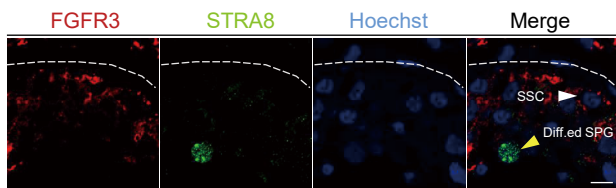**j**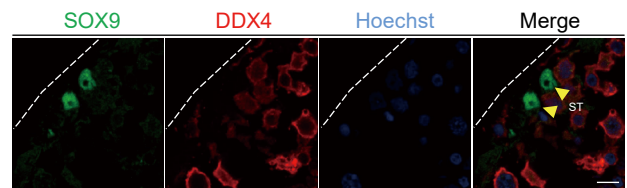**k**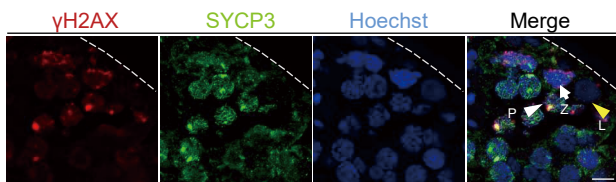**l**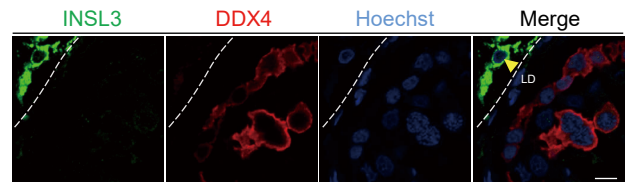

**Supplementary Figures. 1| Comparison of healthy and diabetic testis at single cell resolution.** **a**, Sample information of diabetic patients' testicular cells analyzed in this study. **b**, Bar graph showing the ratio of each cluster in spermatogenesis between normal and diabetic patients. **c**, Cell number of each cluster in spermatogenesis between normal and diabetic patients. **d**, Line plots showing the similar relative expression patterns of the potential marker gene of each cluster between normal and diabetic patients. **e**, Gene expression patterns of somatic marker genes on UMAP plots. A gradient of gray, red indicates low to high expression levels. **f**, Developmental pseudotime of adult human male germ cells from donors with normal fertility (left) and diabetic patients (right). Black line indicates the developmental path of these cells. **g**, Immunofluorescence of FGFR3 (red) co-stained with KIT (green) in diabetic patients' testicular paraffin sections. Scale bar, 10  $\mu$ m. Yellow arrowheads indicated Diff.ing SPG, white arrowhead indicates SSC. **h**, Immunofluorescence of PNA (pink) co-stained with DDX4 (green) in diabetic patients' testicular paraffin sections. Scale bar, 10  $\mu$ m. White arrowhead S1, yellow arrowhead indicated S2, and arrows indicated S3. **i**, Immunofluorescence of FGFR3 (red) co-stained with STRA8 (green) in diabetic patients' testicular paraffin sections. Yellow arrowhead indicates Diff.ed SPG, White arrowhead indicates SSC. Scale bar, 10  $\mu$ m. **j**, Immunofluorescence of DDX4 (red) co-stained with SOX9 (green) in diabetic patients' testicular paraffin sections. Yellow arrowhead indicates Sertoli cells (ST). Scale bar, 10  $\mu$ m. **k**, Immunofluorescence of  $\gamma$ H2AX (red) co-stained with SYCP3 (green). Yellow arrowhead indicates leptotene (L) spermatocytes, white arrowhead indicates zygotene (Z) spermatocytes, and white arrowhead indicates pachytene (P). Scale bar, 10  $\mu$ m. **l**, Immunofluorescence of DDX4 (red) co-stained with INSL3 (green) in diabetic patients' testicular paraffin sections. Scale bar, 10  $\mu$ m. Yellow arrowhead indicates Leydig cells (LD).

**a**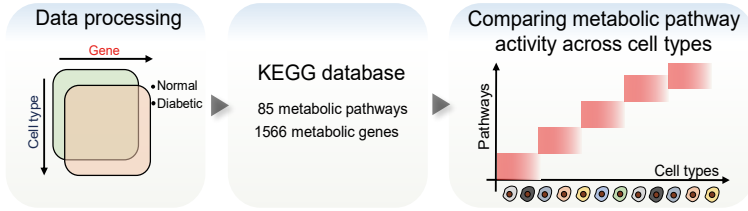**b**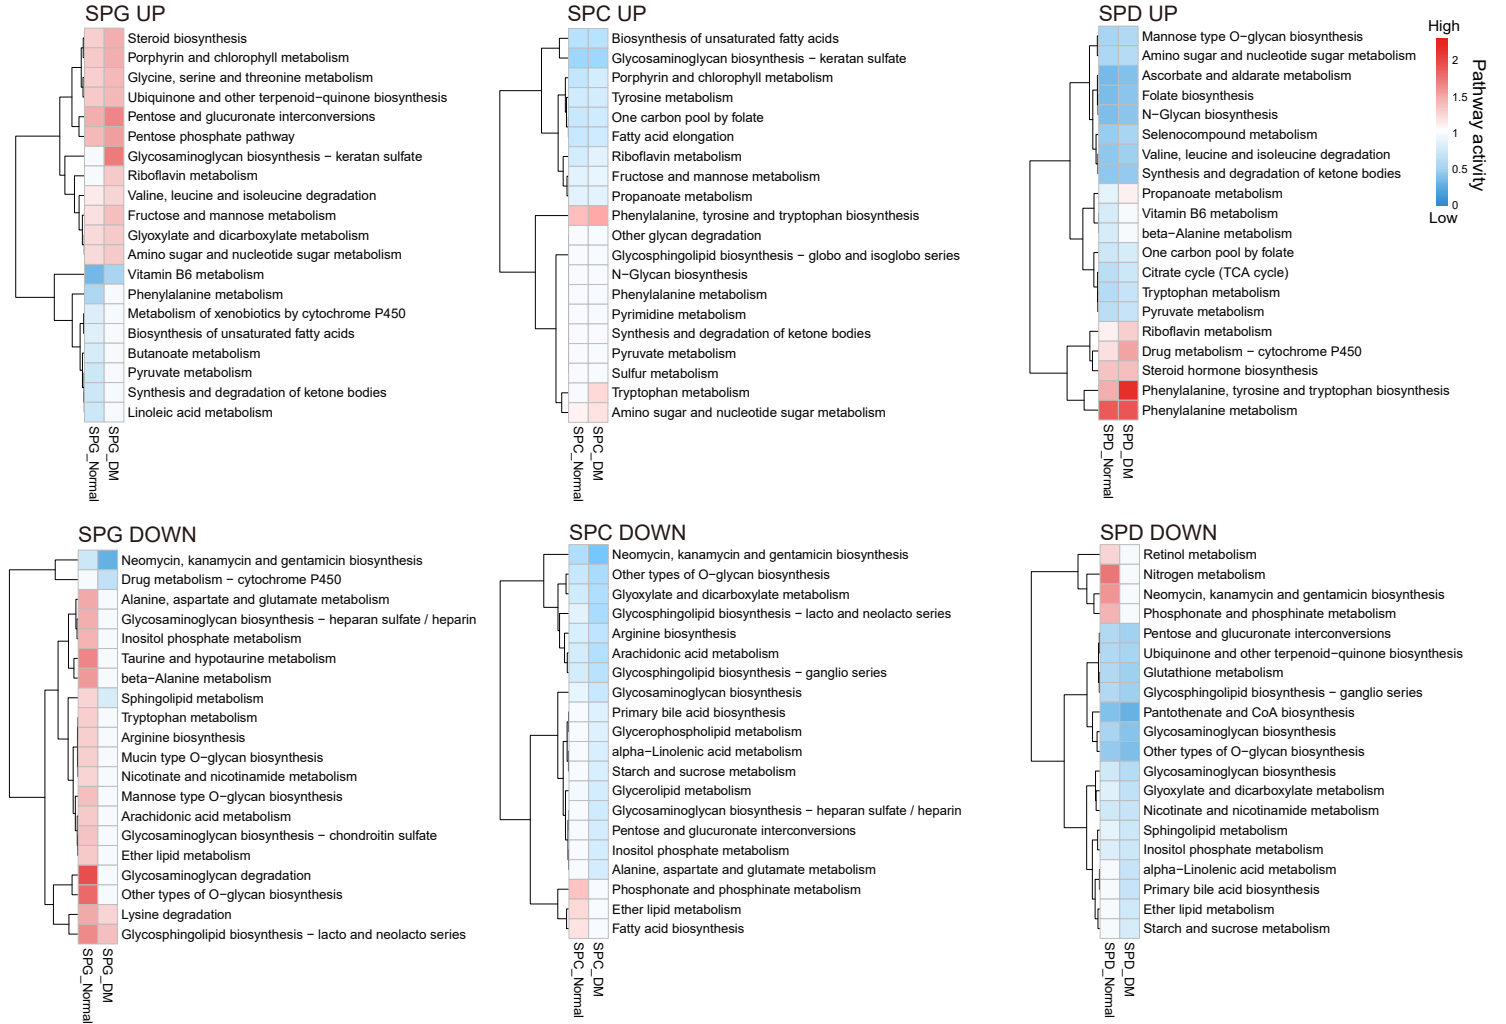**c**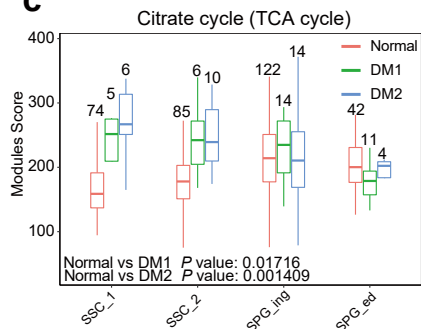**d**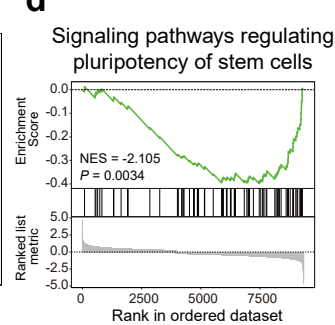**e**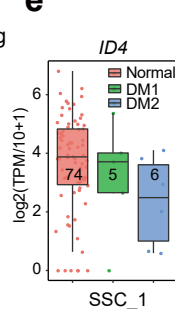**f**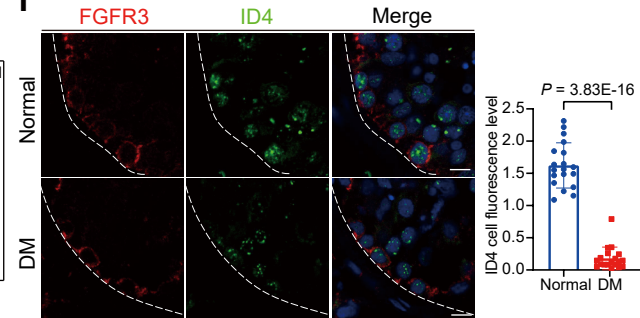

**Supplementary Figures. 2| Metabolic difference in SPG, SPC and SPD stages and metabolic disorders associated with diabetes affect the pluripotency of spermatogonia.** **a**, Schematic illustration of the metabolism related genes analysis workflow. **b**, Metabolic pathway activities in the three major germ cell types (SPG, SPC, SPD) from the normal and diabetic patients single-cell RNA sequencing data. **c**, Boxplot showing the differences in the expression of Citrate cycle (TCA cycle) between normal and diabetic patients at different spermatogonia stages. The y axis represents the sum of the TPM of all genes in this gene set. The cell numbers at each stage are indicated above each box. Each box represents the median and the 25% and 75% quartiles, and the whiskers indicate 1.5 times of the interquartile range. *P* value was calculated by wilcoxon rank sum test. **d**, GSEA analysis showing the down-regulated pathway activity in spermatogonia cells of diabetic patients. *P* value was calculated by permutation test. **e**, Boxplot showing the expression levels of *ID4* in SSC\_1 stage. The cell numbers at each stage are indicated above each box. Each box represents the median and the 25% and 75% quartiles, and the whiskers indicate 1.5 times of the interquartile range. The cell numbers at each stage are indicated above each box. **f**, Immunofluorescence of FGFR3 (red) co-stained with *ID4* (green) in normal and diabetic patients' testicular paraffin sections. n = 3 per group. Mean  $\pm$  SEM. Representative immunofluorescence images and quantitative analysis of *ID4*. Two-tailed student's t test was performed. Scale bar, 10  $\mu$ m.

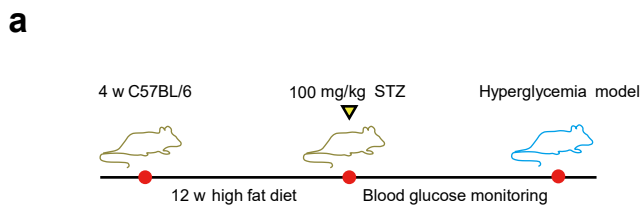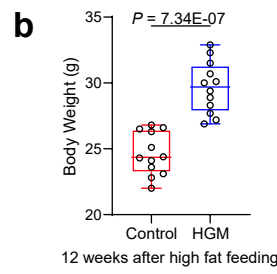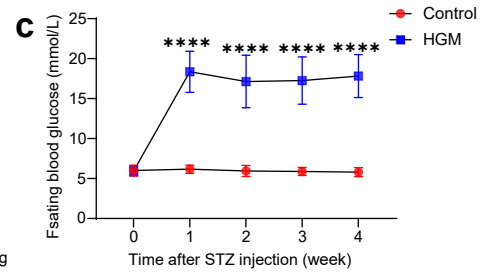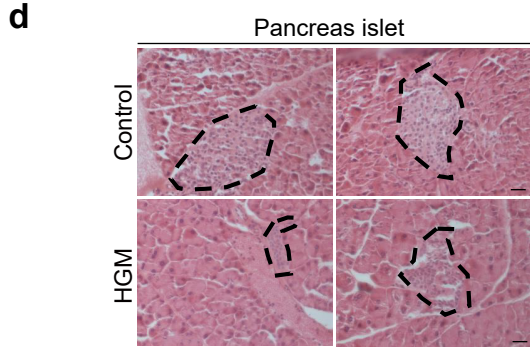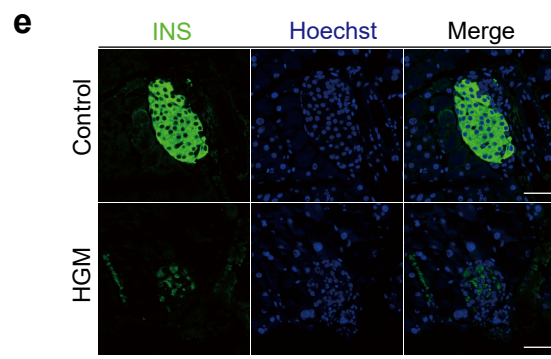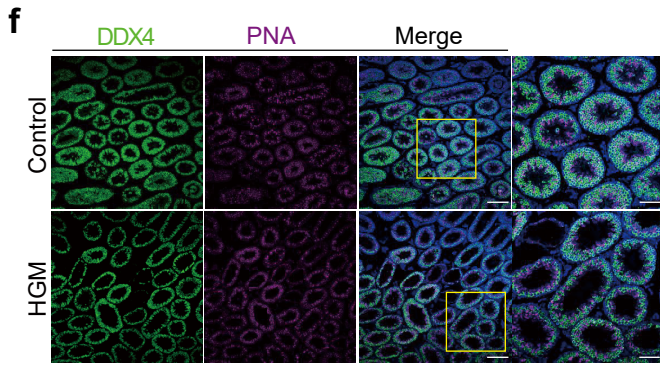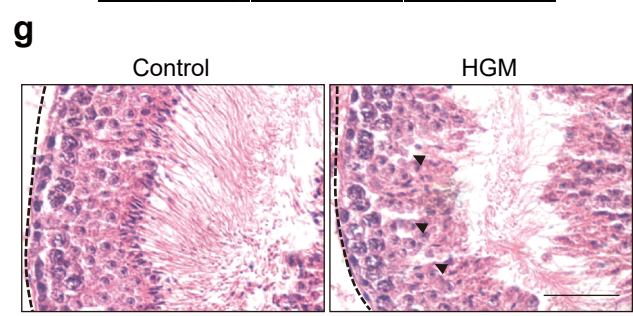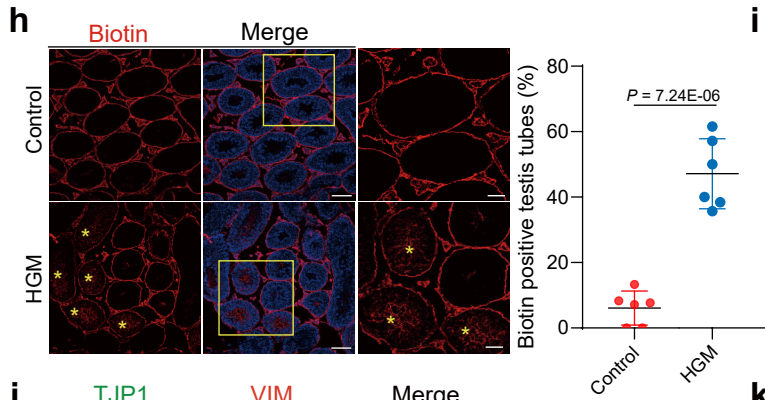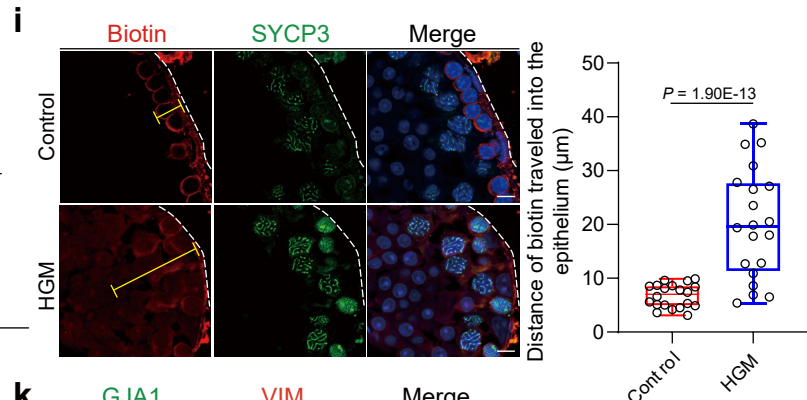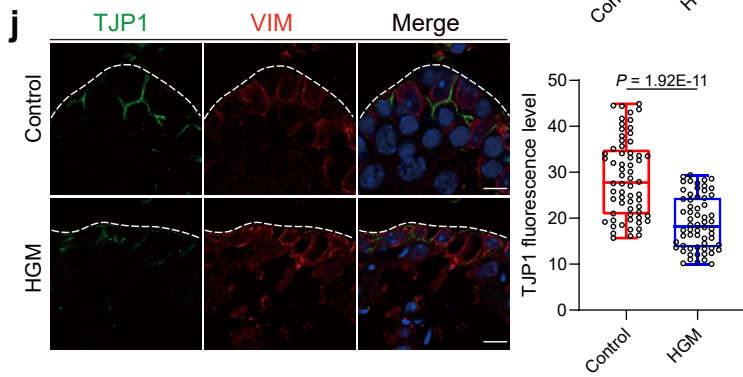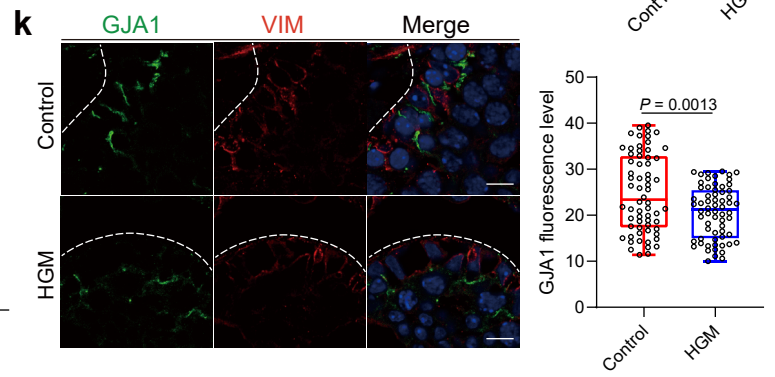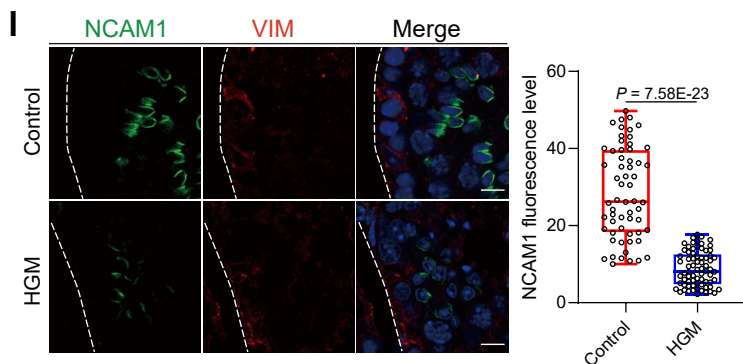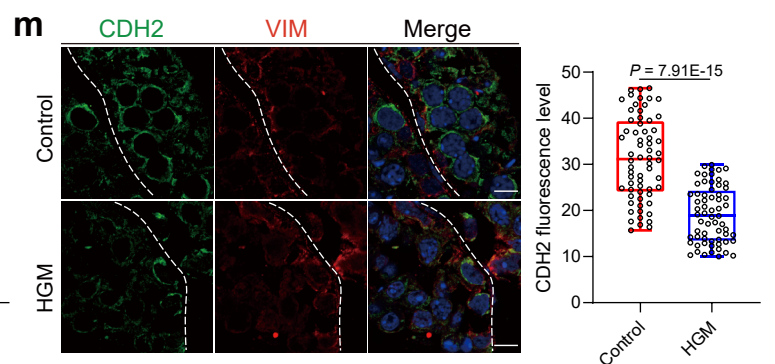

**Supplementary Figures. 3| Loss of BTB integrity in induced hyperglycemia**

**murine model (HGM). a**, Schematic illustration of the hyperglycemia mouse model.

**b**, Body weight between control and HGM after 12 weeks high fat feeding.

Box-and-whisker plots denote the maximum (top whisker), 75th (top edge of box), 25th (bottom edge of box) and minimum (bottom whisker) percentiles, and the median (line in box). n = 12 mice per group.

**c**, Fasting blood glucose between control and HGM after STZ injection. Mean  $\pm$  SEM. \*\*\*\* $p < 0.0001$ . n = 12 mice per group.

**d**, H&E staining of pancreatic sections in control and HGM. The area marked by the dotted line is the islet. Scale bar, 20  $\mu$ m.

**e**, Immunofluorescence of INSULIN (green) in control and HGM pancreatic sections. Scale bar, 50  $\mu$ m.

**f**, Immunofluorescence of PNA (pink) co-stained with DDX4 (green) in control and HGM testicular paraffin sections. Scale bar, 100  $\mu$ m. The yellow rectangular box shows a partial magnification of the testis.

**g**, H&E staining of testicular paraffin sections in control and HGM. Scale bar, 50  $\mu$ m. Black arrows show obvious vacuoles in tubule.

**h**, Immunofluorescence of biotin (red) between control and HGM testicular paraffin sections. Scale bar, 50  $\mu$ m. Biotin positive seminiferous tubules percentage in control and HGM. Mean  $\pm$  SEM. Unpaired two-tailed t test. Statistics were performed in six mouse testes each group (n=6).

**i**, Immunofluorescence of biotin (red) co-stained with SYCP3 (green) in control and HGM testicular paraffin sections. Distance of biotin penetrated into the epithelium were counted in control and HGM. Scale bar, 10  $\mu$ m. Box-and-whisker plots denote the maximum (top whisker), 75th (top edge of box), 25th (bottom edge of box) and minimum (bottom whisker) percentiles, and the median (line in box). Data are presented as means  $\pm$  SEM. Unpaired two-tailed t test.

**j-m**, Immunofluorescence of VIM (red) co-stained with TJP1, GJA1, NCAM1 and CDH2 (green) in control and HGM testicular paraffin sections. n = 3 per group. Box-and-whisker plots denote the maximum (top whisker), 75th (top edge of box), 25th (bottom edge of box) and minimum (bottom whisker) percentiles, and the median (line in box). Representative immunofluorescence images and quantitative analysis of TJP1, GJA1, NCAM1 and CDH2. Scale bar, 10  $\mu$ m. Two-tailed student's t test was performed.

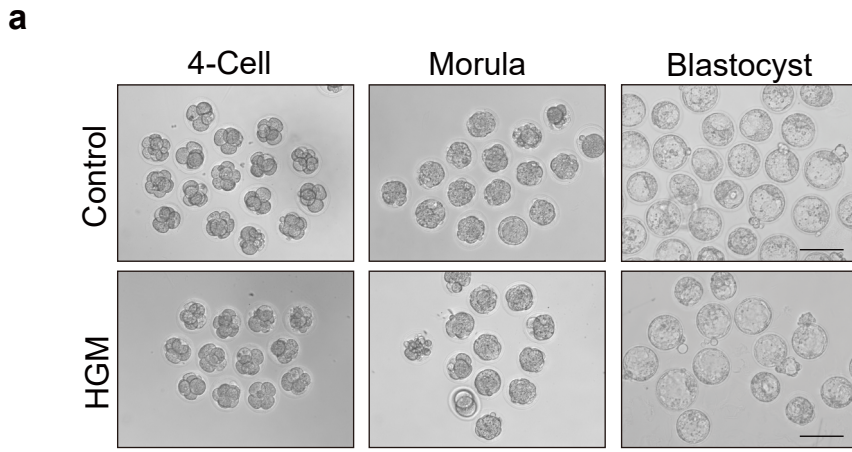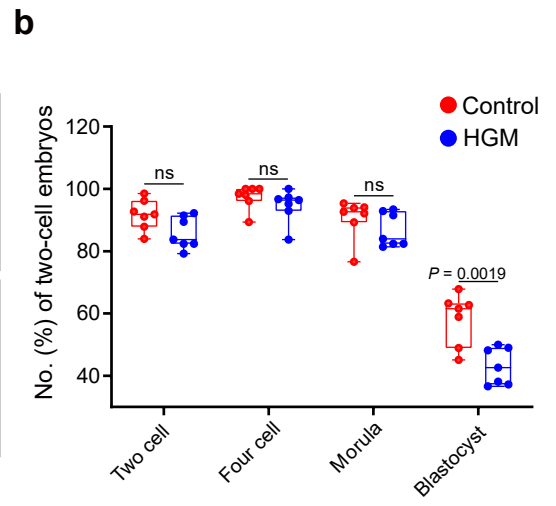

**c**

| Origin of sperm | No. of Injected oocytes | No. (%) of two-cell embryos | No. (%) of two-cell embryos cultured in vitro | No. (%) of blastocysts |
|-----------------|-------------------------|-----------------------------|-----------------------------------------------|------------------------|
| Control         | 350                     | 324 (92.0%)                 | 324                                           | 171 (52.7%)            |
| HGM             | 355                     | 300 (84.5%)                 | 300                                           | 99 (33.0%)             |



**Supplementary Figures. 4| Decreased sperm quality in hyperglycemia murine model.**

**a**, Brightfield diagram of 4-Cell, Morula and Blastocyst between control and HGM. Scale bar, 1 mm. **b**, Two cell, Four cell, Morula and Blastocyst development rate in control and HGM. Unpaired two-tailed t test.  $n = 6$  independent experiments. Box-and-whisker plots denote the maximum (top whisker), 75th (top edge of box), 25th (bottom edge of box) and minimum (bottom whisker) percentiles, and the median (line in box). **c**, The trilinear table shows all the embryo injection data in control and HGM.

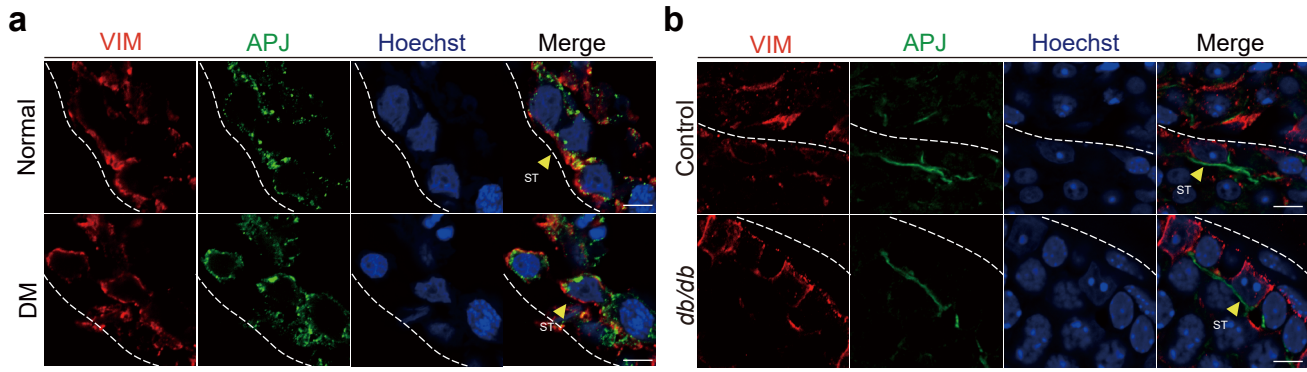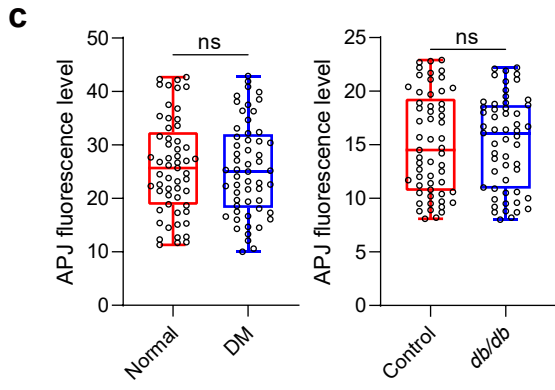

**Supplementary Figures. 5| APJ expression is not affected in the testis of diabetic mice.**

**a**, Immunofluorescence of VIM (red) co-stained with APJ (green) in normal and diabetic patients' testicular paraffin sections. Scale bar, 10  $\mu\text{m}$ . The yellow arrow indicates the Sertoli cells. **b**, Immunofluorescence of VIM (red) co-stained with APJ (green) in control and *db/db* testicular paraffin sections. Scale bar, 10  $\mu\text{m}$ . The yellow arrow indicates the Sertoli cells. **c**, Quantitative analysis of APJ. ns, not significant.  $n = 3$  per group. Box-and-whisker plots denote the maximum (top whisker), 75th (top edge of box), 25th (bottom edge of box) and minimum (bottom whisker) percentiles, and the median (line in box). Fluorescence intensity values of more than 50 positive cells in at least 5 fields of view were counted in normal and diabetic patients' testicular paraffin sections and *db/db* testicular paraffin sections. Two-tailed student's t test was performed.

**a**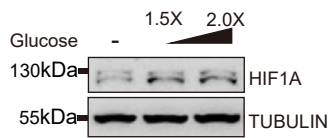**b**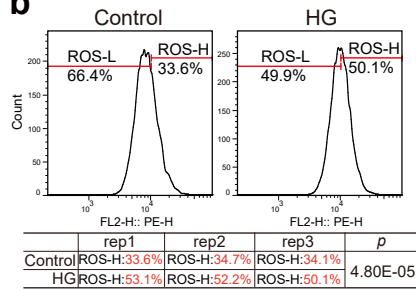**c**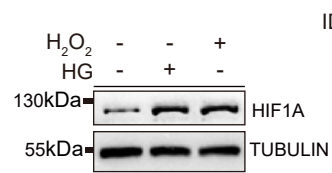**d**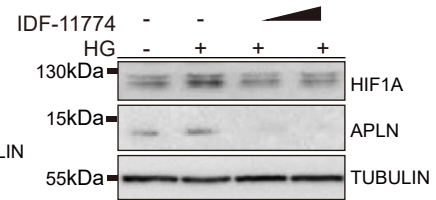

**Supplementary Figures. 6| High glucose-induced ROS elevation activates HIF1A.**

**a**, Immunoblots of HIF1A in TM4 treated different concentrations glucose. **b**, Representative figures for TM4 cell treated with high glucose for 24 hours followed by DHE staining and flow cytometry. Results of three independent experiments are shown (n=3). Two-tailed student's t test was performed. **c**, Immunoblots of HIF1A in TM4 treated with high glucose and H<sub>2</sub>O<sub>2</sub>. **d**, Immunoblots of HIF1A and APLN in TM4 treated different concentrations IDF-11774 (HIF1A inhibitor) and HG.

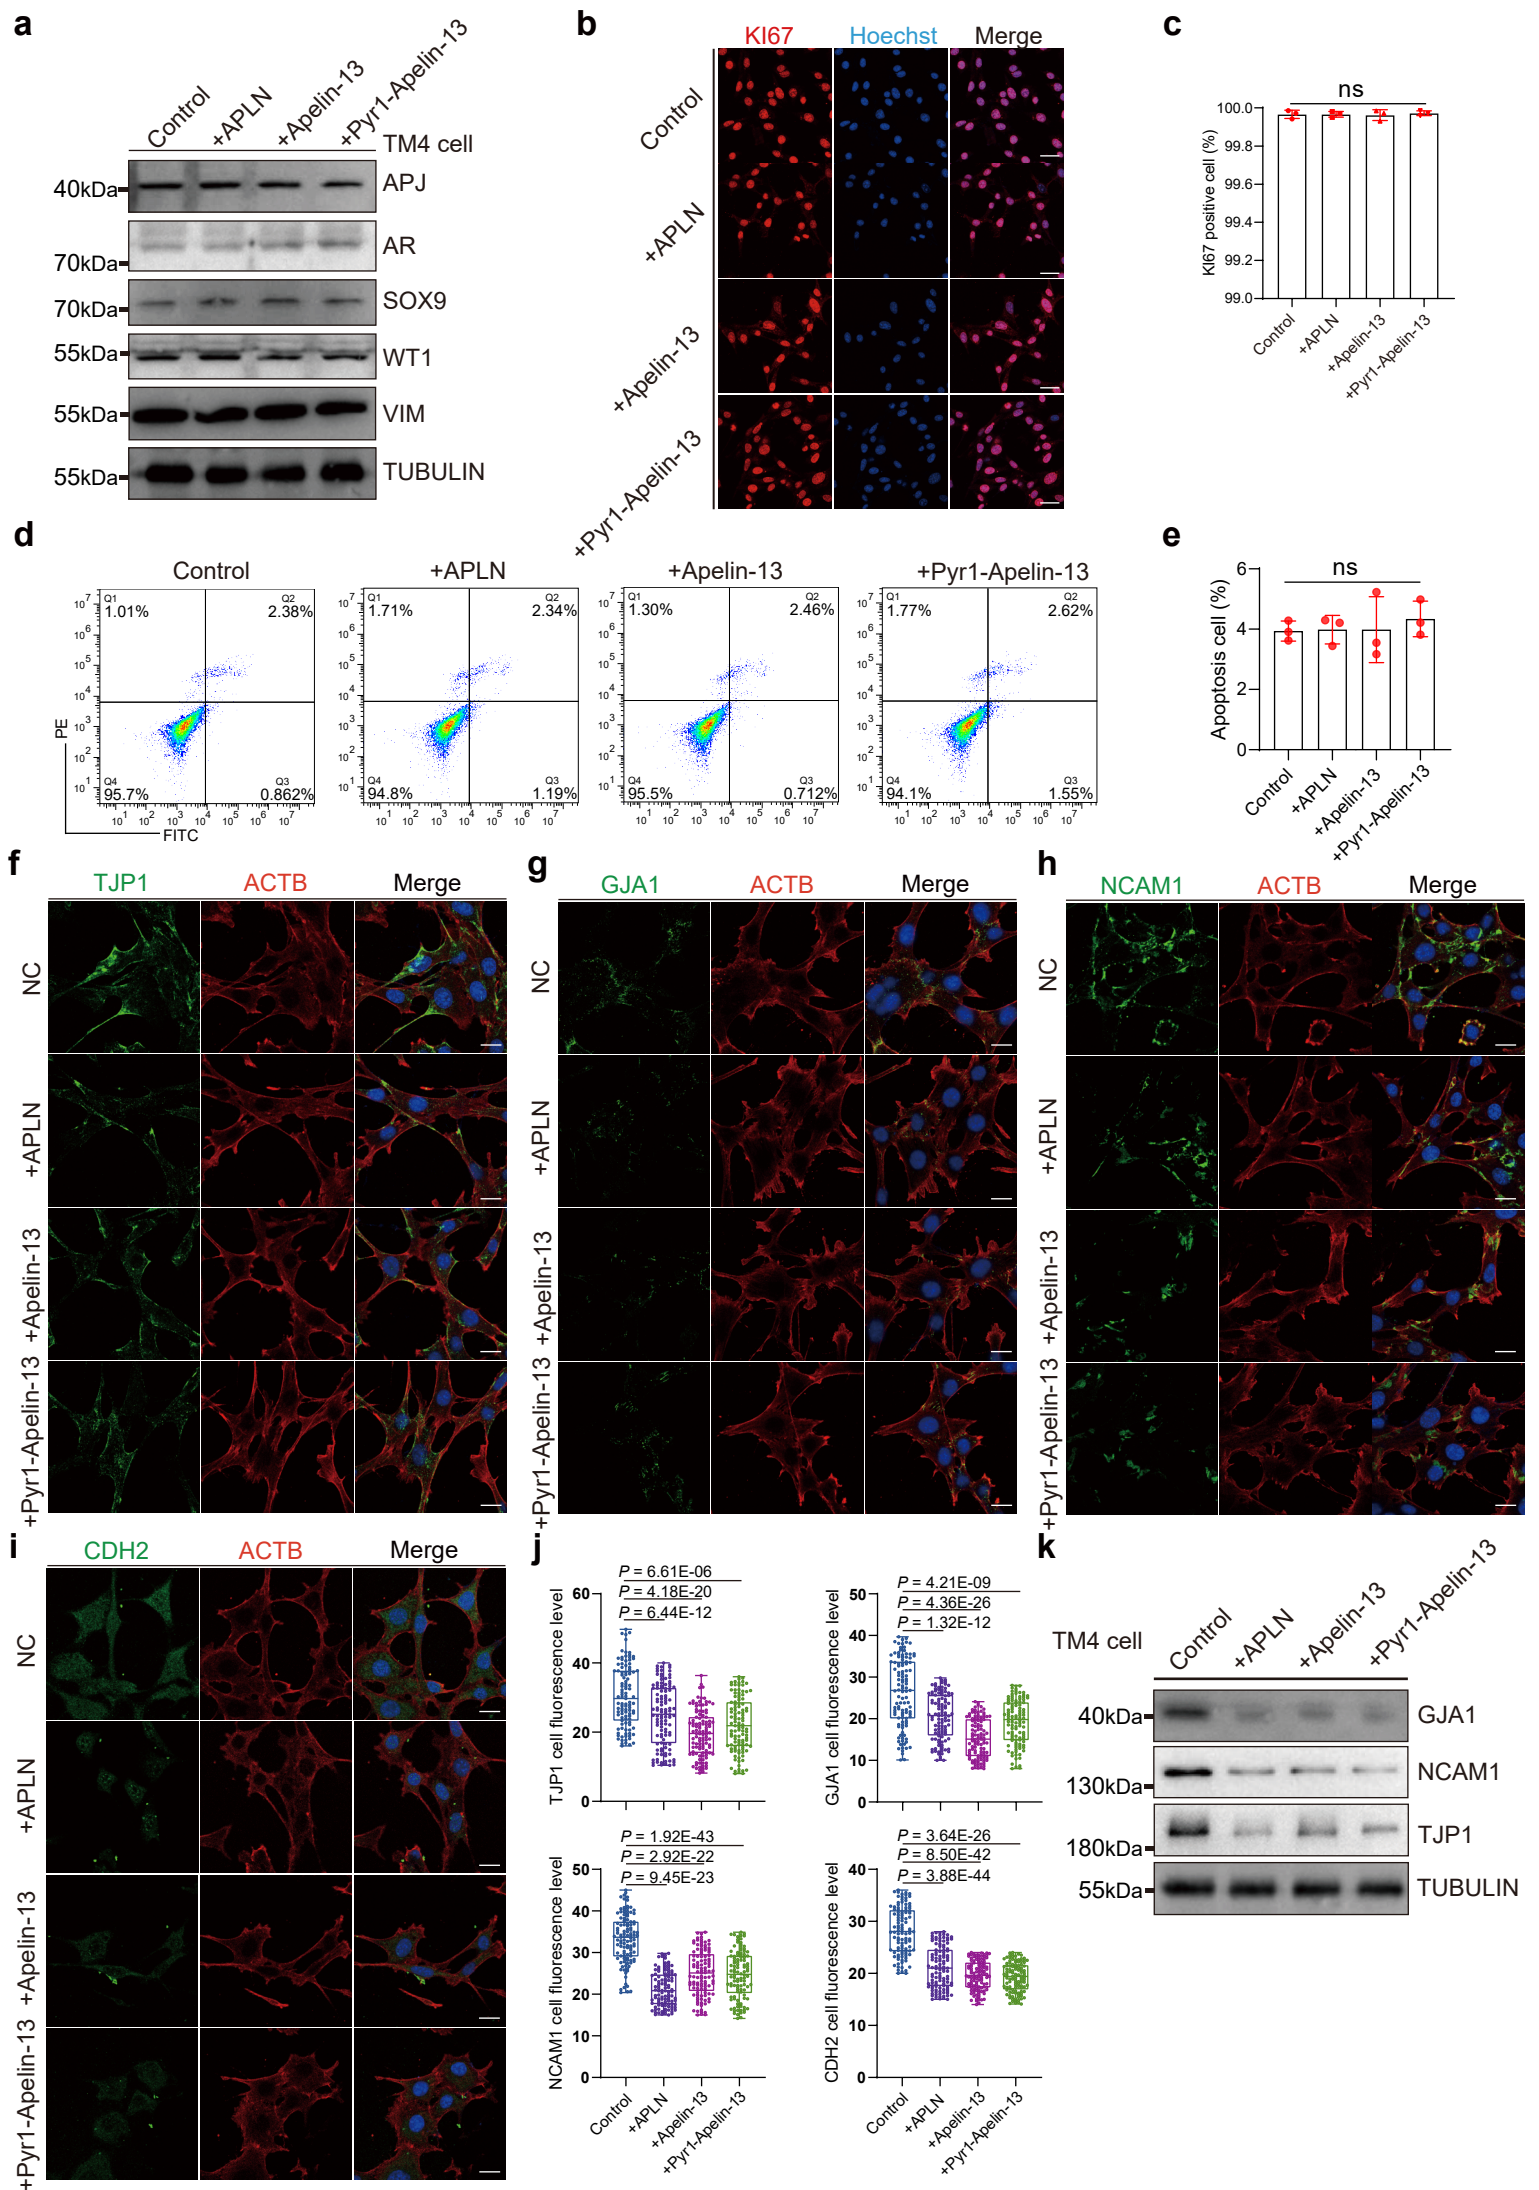

**Supplementary Figures. 7 | Various active forms of APLN impairs cell junction proteins expression without affecting cell identity and viability.** **a**, Immunoblots of indicated proteins in TM4 treated APLN, Apelin-13 and Pyr1-Apelin-13. **b**, Immunofluorescence of KI67 (red) in TM4 treated APLN, Apelin-13 and Pyr1-Apelin-13. Scale bar, 50  $\mu$ m. **c**, KI67-positive cells percentage statistics in TM4 treated APLN, Apelin-13 and Pyr1-Apelin-13, Mean  $\pm$  SEM. ns, not significant, one-way ANOVA. Results of three independent experiments are shown (n=3). **d**, Annexin V-FITC apoptosis assay on TM4 cells treated with APLN, Apelin-13 and Pyr1-Apelin-13. **e**, Apoptosis rate on TM4 cells treated with APLN, Apelin-13 and Pyr1-Apelin-13. Mean  $\pm$  SEM. ns, not significant, one-way ANOVA. Results of three independent experiments are shown (n=3). **f**, Immunofluorescence of ACTB (red) co-stained with TJP1 (green) on TM4 cells treated with APLN, Apelin-13 and Pyr1-Apelin-13. Scale bar, 10  $\mu$ m. **g**, Immunofluorescence of ACTB (red) co-stained with GJA1 (green) on TM4 cells treated with APLN, Apelin-13 and Pyr1-Apelin-13. Scale bar, 10  $\mu$ m. **h**, Immunofluorescence of ACTB (red) co-stained with NCAM1 (green) on TM4 cells treated with APLN, Apelin-13 and Pyr1-Apelin-13. Scale bar, 10  $\mu$ m. **i**, Immunofluorescence of ACTB (red) co-stained with CDH2 (green) on TM4 cells treated with APLN, Apelin-13 and Pyr1-Apelin-13. Scale bar, 10  $\mu$ m. **j**, Quantitative analysis of TJP1, GJA1, NCAM1 and CDH2. n = 3 biologically independent samples. Box-and-whisker plots denote the maximum (top whisker), 75th (top edge of box), 25th (bottom edge of box) and minimum (bottom whisker) percentiles, and the median (line in box). Fluorescence intensity values of more than 100 positive cells were counted in TM4 cells treated with APLN, Apelin-13 and Pyr1-Apelin-13. One-way ANOVA was performed. **k**, Immunoblots of GJA1, NCAM1, TJP1 in TM4 treated APLN, Apelin-13 and Pyr1-Apelin-13.

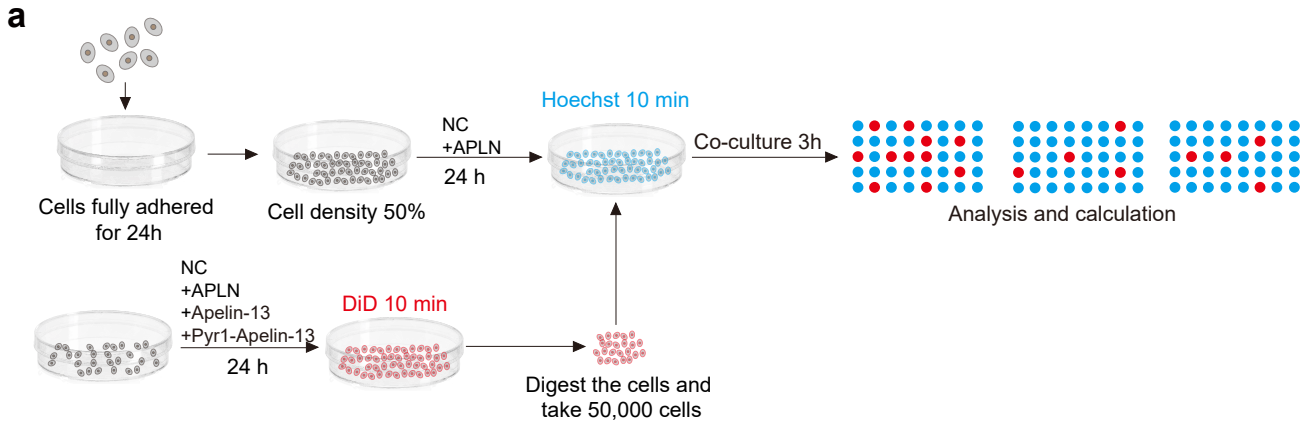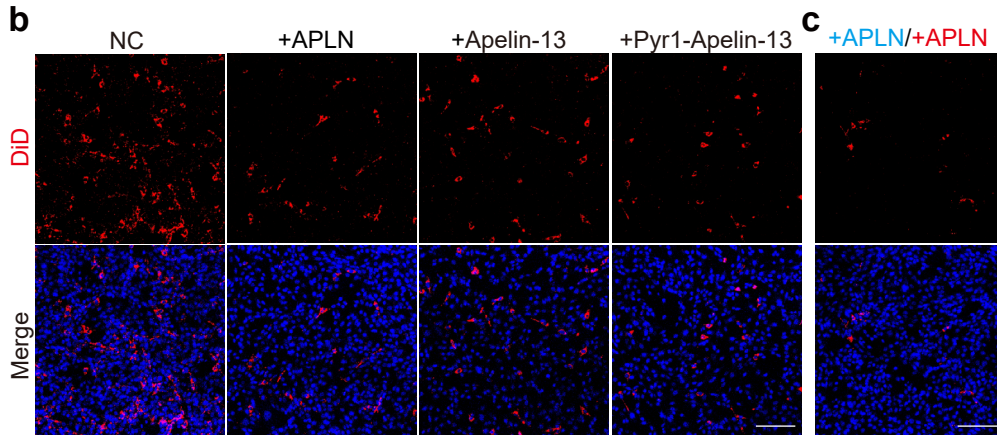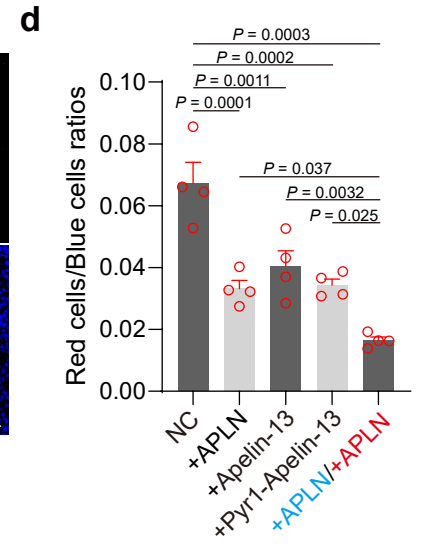



**Supplementary Figures. 8| Cell adhesion assays after treatment of TM4 cells with different APLN and its small molecules.** **a**, Experimental design for cell adhesion assay. **b**, Representative images of DiD (red) immunofluorescence in TM4 cell. Scale bar, 100  $\mu\text{m}$ . **c**, Representative images of DiD (red) immunofluorescence both treated APLN in “red” and “blue” TM4 cell. Scale bar, 100  $\mu\text{m}$ . **d**, Statistics on the ratio of red TM4 cells to blue TM4 cells.  $n=4$  biologically independent experiments. Data are presented as means  $\pm$  SEM. More than 500 cells were counted in each subgroup. One-way ANOVA was performed.

**a**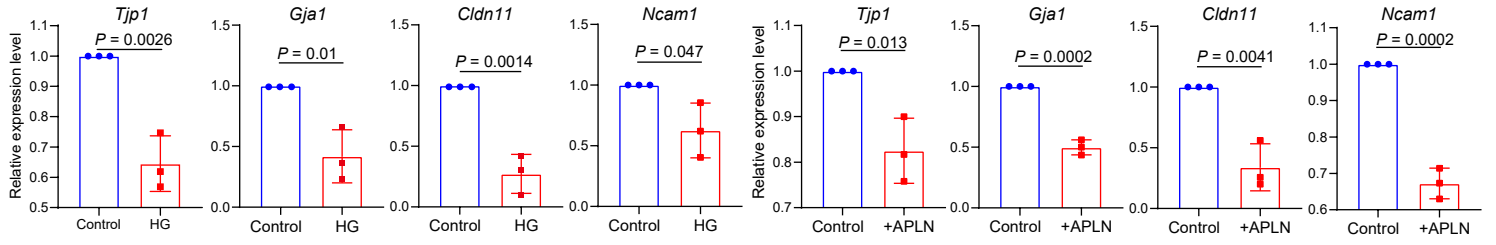**b**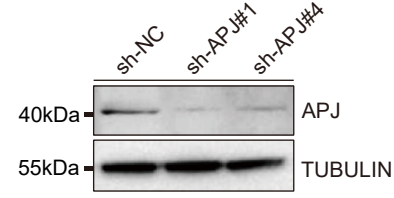**c**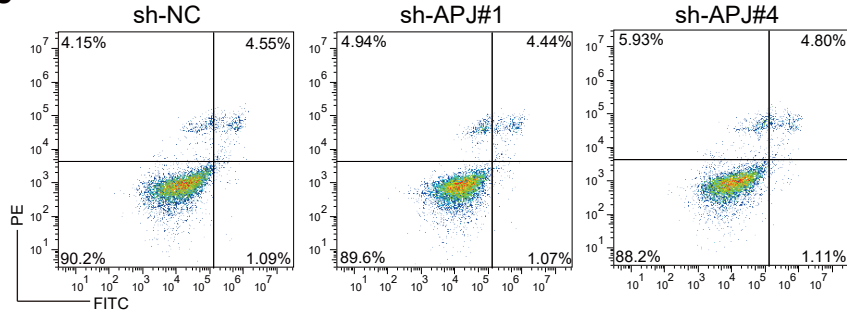**d**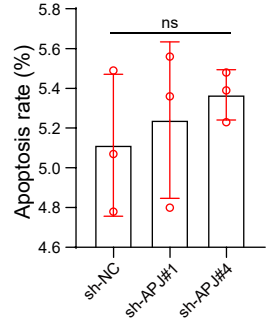**e**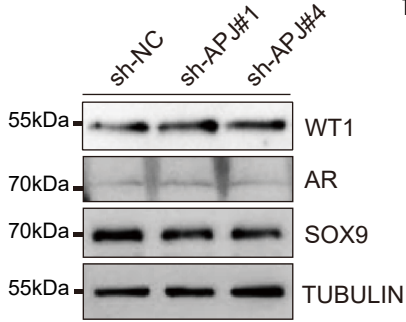**f**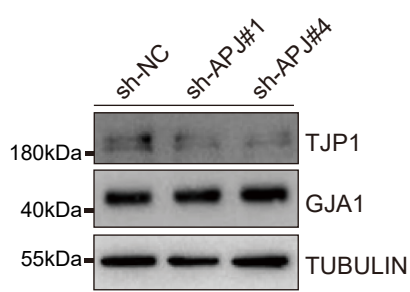**g**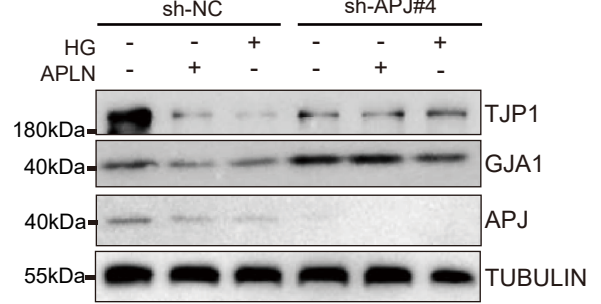

**Supplementary Figures. 9| Targeting APJ restores expression of cell adhesion proteins under high glucose or with APLN treatment.** **a**, The relative expression levels of *Ncam1*, *Cldn11*, *Gjal*, *Tjp1* in TM4 cell under high glucose or APLN. Data are presented as means  $\pm$  SEM. Unpaired two-tailed t test was performed. Results of three independent experiments are shown. n = 3 per group. **b**, Immunoblots of APJ in TM4 cells transfected shRNA of APJ. **c**, Annexin V-FITC apoptosis assay on TM4 cells transfected shRNA of APJ. **d**, Apoptosis rate on TM4 cells transfected shRNA of APJ, ns, not significant, one-way ANOVA. Results of three independent experiments are shown. n = 3 biologically independent cell. Mean  $\pm$  SEM. **e**, Immunoblots of WT1, AR and SOX9 in stable KD APJ cell. **f**, Immunoblots of TJP1, GJA1 and NCAM1 in stable KD APJ cell. **g**, Immunoblots of indicated proteins in stable KD APJ cell treated APLN or high glucose.

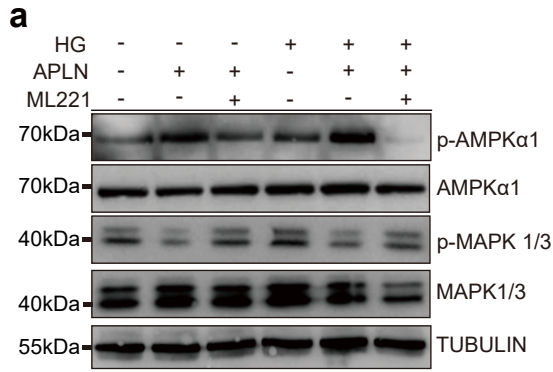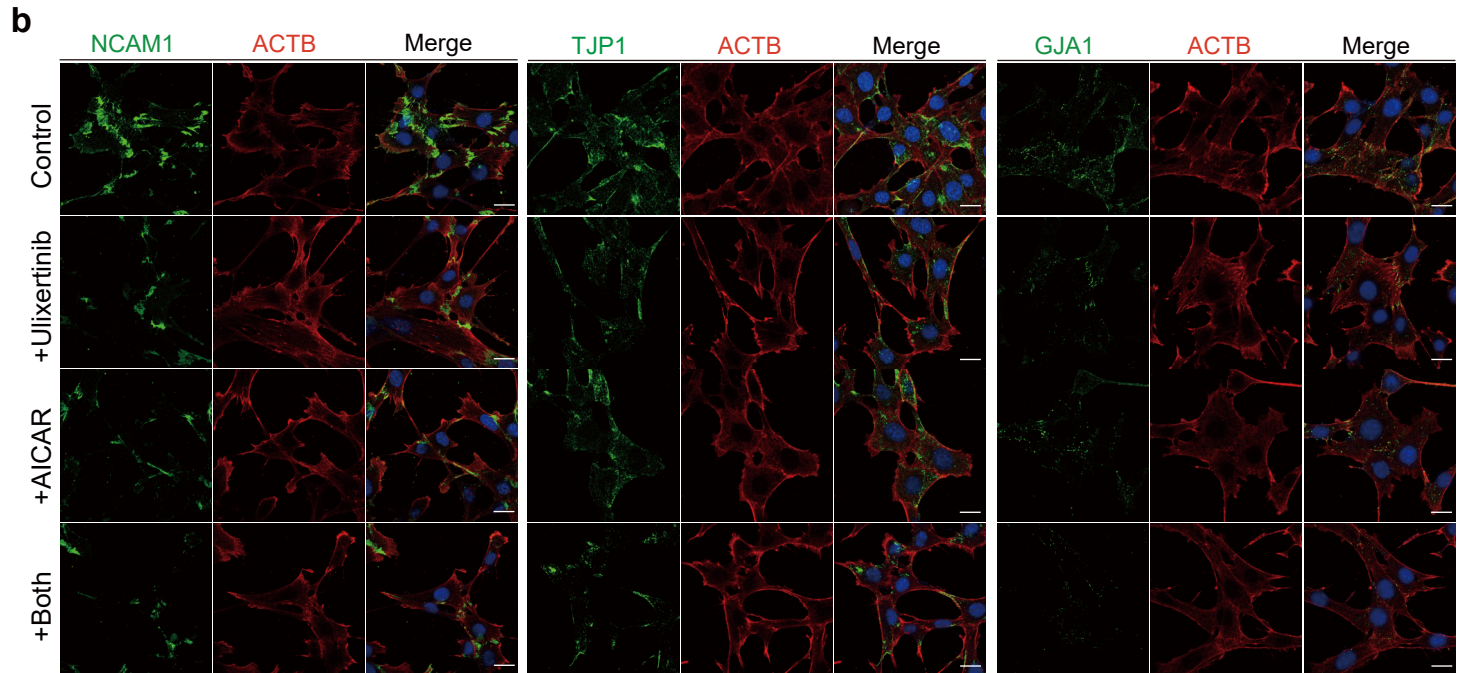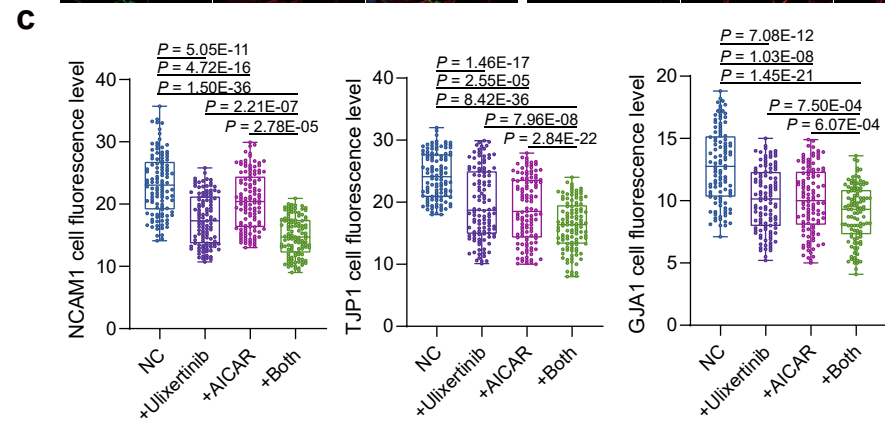

**Supplementary Figures. 10| The AMPK and MAPK pathways are downstream effectors of APLN/APJ in Sertoli cells.** **a**, Immunoblots of AMPK $\alpha$ 1, p-AMPK $\alpha$ 1, MAPK1/3 and p-MAPK1/3 in TM4 treated high glucose, APLN or both. **b**, Immunofluorescence of ACTB (red) co-stained with TJP1, NCAM1, GJA1 (green) on TM4 cells treated with Ulixertinib, AICAR or both. Scale bar, 10  $\mu$ m. **c**, Quantitative analysis of TJP1, GJA1, and CDH2. n = 3 per group. Box-and-whisker plots denote the maximum (top whisker), 75th (top edge of box), 25th (bottom edge of box) and minimum (bottom whisker) percentiles, and the median (line in box). Fluorescence intensity values of more than 100 positive cells were counted in TM4 cells treated with Ulixertinib, AICAR or both. Two-tailed student's t test was performed.

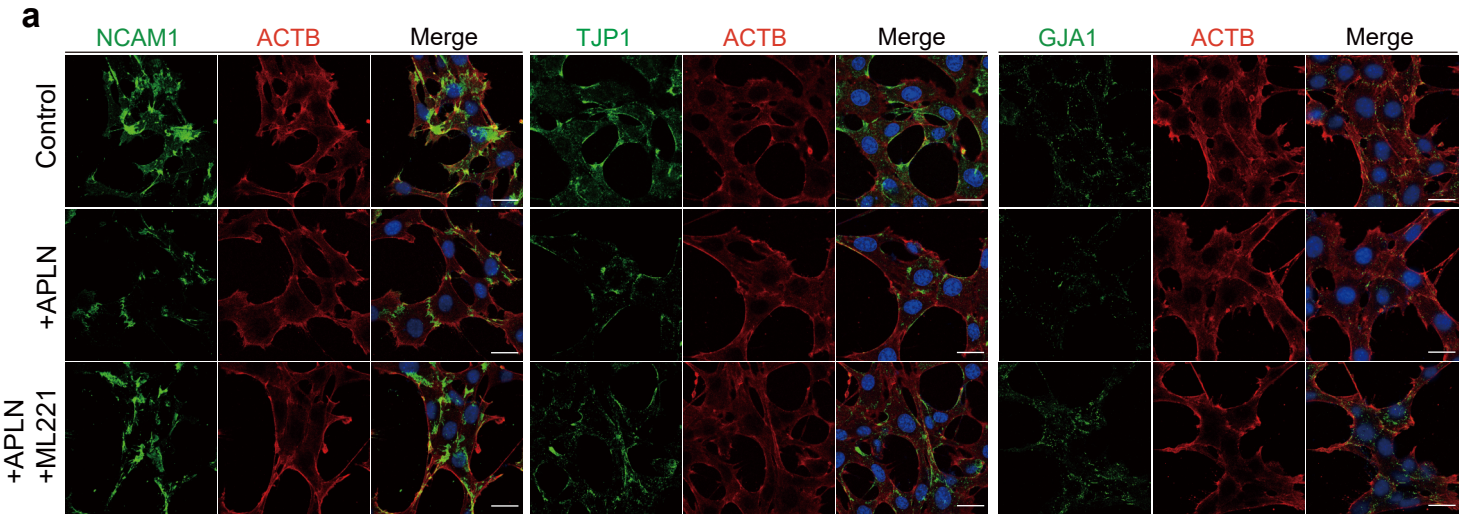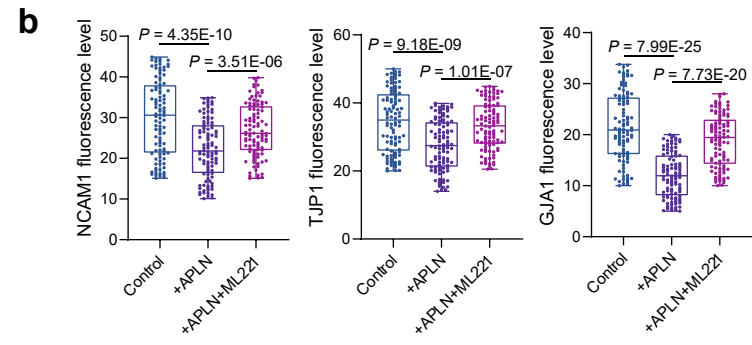

**Supplementary Figures. 11| Compromising APLN effect with ML221 in cultured TM4 cells.** **a**, Immunofluorescence of ACTB (red) co-stained with TJP1, NCAM1, GJA1 (green) on TM4 cells treated with APLN, or APLN combined with ML221. Scale bar, 10  $\mu$ m. **b**, Quantitative analysis of TJP1, GJA1, and CDH2. n = 3 per group. Box-and-whisker plots denote the maximum (top whisker), 75th (top edge of box), 25th (bottom edge of box) and minimum (bottom whisker) percentiles, and the median (line in box). Fluorescence intensity values of more than 100 positive cells were counted in TM4 cells treated with APLN, or APLN combined ML221. Two-tailed student's t test was performed.

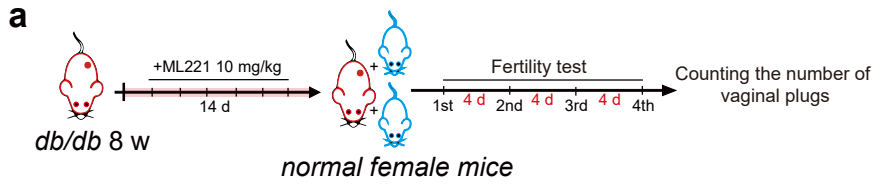

**b**

| Group (n)                | No. of estrous female mice | 1st vaginal plugs | 2nd vaginal plugs | 3rd vaginal plugs | 4th vaginal plugs |
|--------------------------|----------------------------|-------------------|-------------------|-------------------|-------------------|
| <i>db/db</i> Control (6) | 12                         | 0/12              | 0/12              | 0/12              | 0/12              |
| <i>db/db</i> ML221 (6)   | 12                         | 0/12              | 0/12              | 0/12              | 0/12              |



**Supplementary Figures. 12| Mating behavior and fertility test.**

**a**, Schematic illustration of the experimental and analysis workflow. **b**, Fertility testing of control and ML221 group.

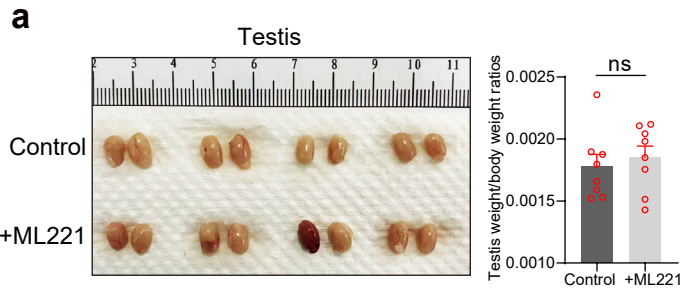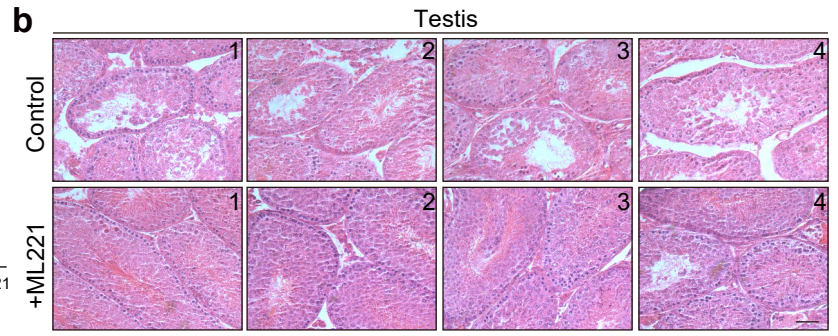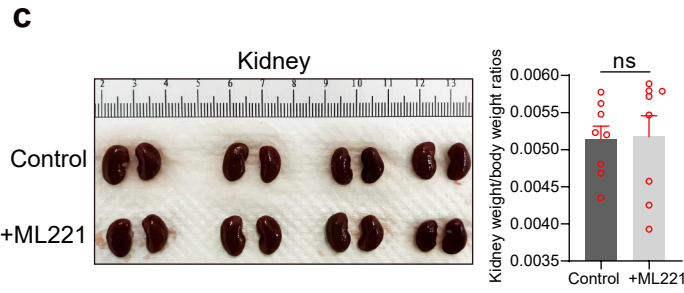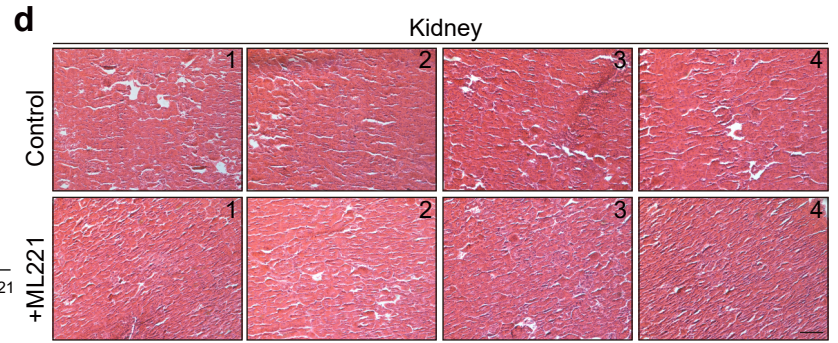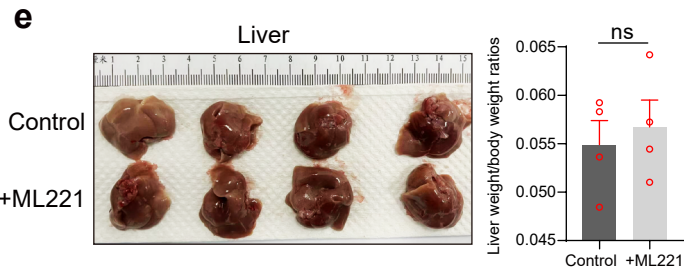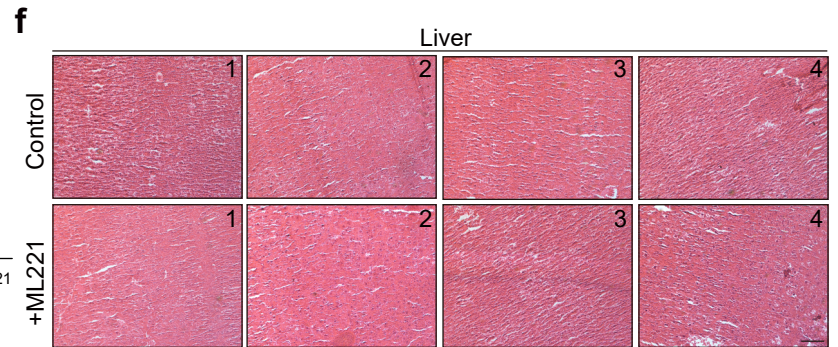

**Supplementary Figures. 13| Testis, kidney and liver weights and H&E staining between control and ML221 injection group.** **a**, Brightfield diagram of testis between control and ML221 injection group and weight statistics. Each group has four mice. Mean  $\pm$  SEM. ns, not significant, unpaired two-tailed t test. **b**, H&E staining of testicular sections in control and ML221 injection group. Scale bar, 100  $\mu$ m. **c**, Brightfield diagram of kidney between control and ML221 injection group and weight statistics. Each group has four mice. Mean  $\pm$  SEM. ns, not significant, unpaired two-tailed t test. **d**, H&E staining of renal sections in control and ML221 injection group. Scale bar, 200  $\mu$ m. **e**, Brightfield diagram of liver between control and ML221 injection group and weight statistics. Each group has four mice. ns, not significant, unpaired two-tailed t test. Mean  $\pm$  SEM. **f**, H&E staining of liver sections in control and ML221 injection group. Scale bar, 200  $\mu$ m.

**a**

|                           | <i>db/db</i> -Control |       |       |       | <i>db/db</i> -ML221 |       |       |       | C57BL/6N |       |       |       |
|---------------------------|-----------------------|-------|-------|-------|---------------------|-------|-------|-------|----------|-------|-------|-------|
| Mouse numbers             | 1                     | 2     | 3     | 4     | 1                   | 2     | 3     | 4     | 1        | 2     | 3     |       |
| Sperm counts (million/mL) | 1,289                 | 1,187 | 1,615 | 1,368 | 2,956               | 2,694 | 4,167 | 3,011 | 3,369    | 3,605 | 4,016 |       |
| Sperm motility            | PR(%)                 | 7.43  | 8.15  | 9.45  | 10.7                | 37.1  | 29.3  | 26.6  | 29.9     | 28.5  | 42.8  | 32.9  |
|                           | NR(%)                 | 4.05  | 5.73  | 3.70  | 0.38                | 7.46  | 7.62  | 7.09  | 7.73     | 6.60  | 5.66  | 6.86  |
|                           | IM(%)                 | 88.5  | 86.1  | 86.9  | 85.5                | 55.5  | 63.5  | 66.3  | 62.2     | 64.9  | 51.6  | 60.28 |

**b**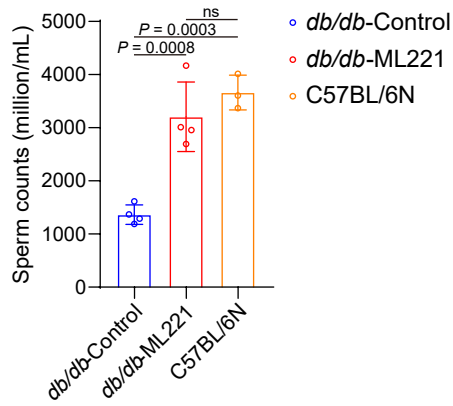**c**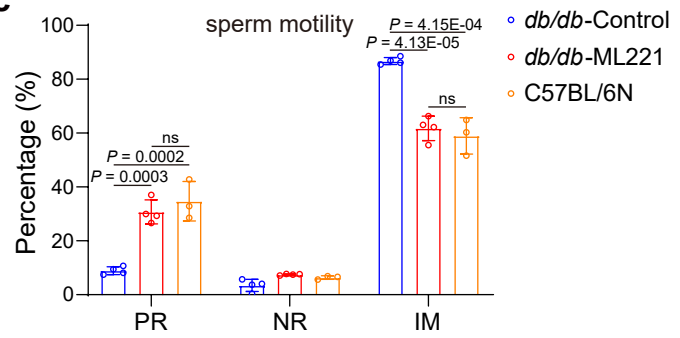**d**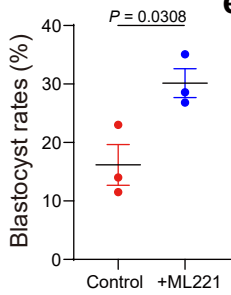**e**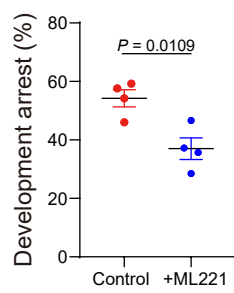**f**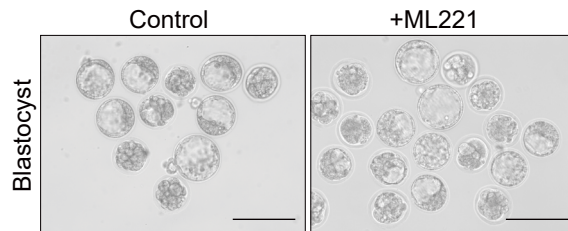

**Supplementary Figures. 14| ML221 significantly improved sperm count, motility and ICSI blastocyst rate in *db/db* mice. a**, Sperm counts and sperm motility level between control, ML221 and C57BL/6N group. PR: progressive motile, NP: non-progressive motile, IM: immotility. **b**, Sperm counts of control, ML221 and C57BL/6N group. ns, not significant, unpaired two-tailed t test. Mean  $\pm$  SEM. n = 4 mice per group (n = 3 mice for C57BL/6N). **c**, Sperm motility of control, ML221 and C57BL/6N group. Mean  $\pm$  SEM. ns, not significant, unpaired two-tailed t test. n = 4 mice per group (n = 3 mice for C57BL/6N). **d**, Blastocyst development rate in control and ML221 injection group. n = 3 biologically independent experiments. Mean  $\pm$  SEM. Unpaired two-tailed t test. **e**, Blastocyst arrest rate in control and ML221 injection group. n = 4 biologically independent experiments. Mean  $\pm$  SEM. Unpaired two-tailed t test. **f**, Brightfield diagram of blastocyst between control and ML221 injection group. Scale bar, 200  $\mu$ m.

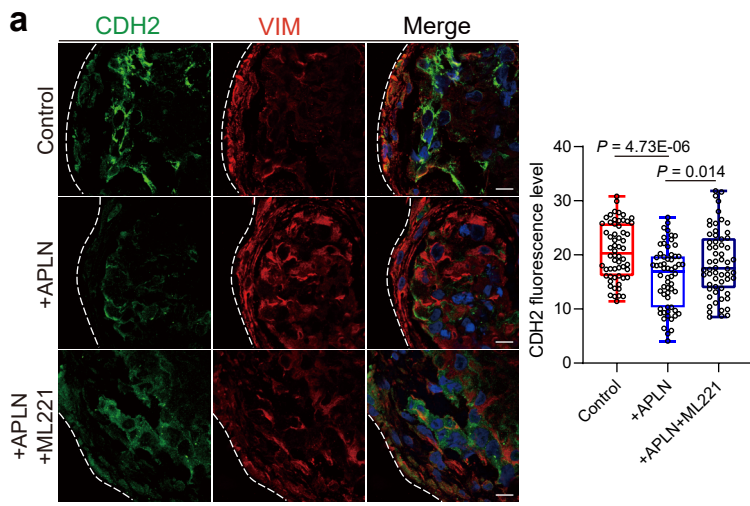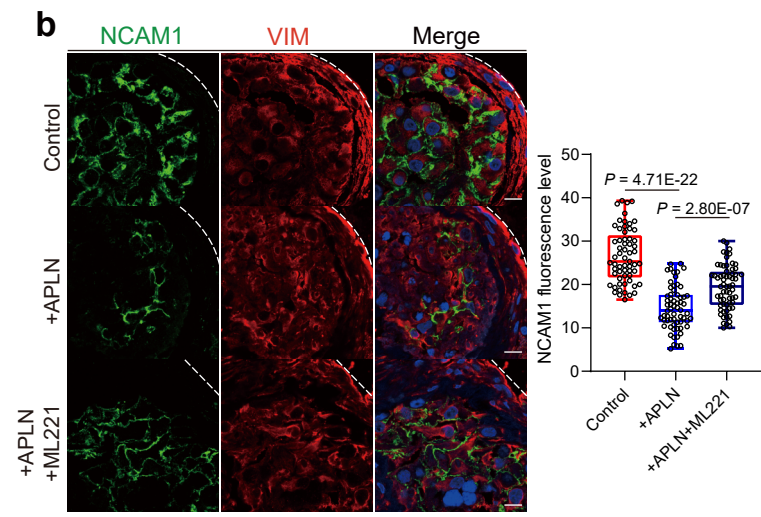

**Supplementary Figures. 15| Inhibition APLN improves BTB related gene expression in human cultured testis. a,** Immunofluorescence of CDH2 (green) and VIM (red) in human testis culture on Day 7 paraffin sections between indicated sample groups. Scale bar, 20  $\mu\text{m}$ . n = 3 per group. Box-and-whisker plots denote the maximum (top whisker), 75th (top edge of box), 25th (bottom edge of box) and minimum (bottom whisker) percentiles, and the median (line in box). Quantitative analysis of CDH2. Data are presented as means  $\pm$  SEM. One-way ANOVA was performed. **b,** Immunofluorescence of NCAM1 (green) and VIM (red) in human testis culture on Day 7 paraffin sections between indicated sample groups. Scale bar, 20  $\mu\text{m}$ . n = 3 per group. Box-and-whisker plots denote the maximum (top whisker), 75th (top edge of box), 25th (bottom edge of box) and minimum (bottom whisker) percentiles, and the median (line in box). Quantitative analysis of NCAM1. Unpaired two-tailed t test was performed.

**a**

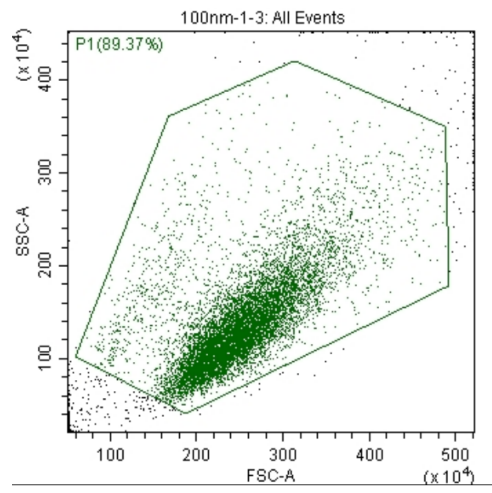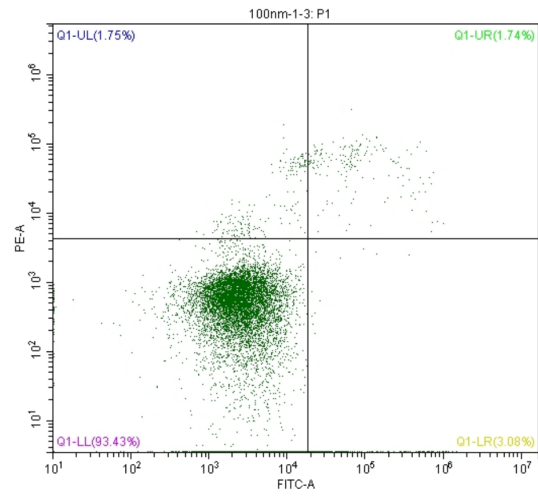



**Supplementary Figures. 16| Annexin V-FITC apoptosis assay analysis by FACS.**

**a,** Representative FACS gating scheme for Annexin V-FITC apoptosis assay.
