# Supplementary material for: Targeting APLN/APJ restores blood-testis barrier and improves spermatogenesis in murine and human diabetic models
Source: PubMed Central journal article supplement (PMC9705293; doi:10.1038/s41467-022-34990-3), 2022-11-28
Supplement: 41467_2022_34990_MOESM2_ESM.pdf [file 41467_2022_34990_MOESM2_ESM.pdf]

## Description of Additional Supplementary Files

File Name: Supplementary Data 1

Description: Total differential genes and metabolism-related genes related to Fig. 1d.

P value was calculated by wilcoxon rank sum test.

File Name: Supplementary Data 2

Description: DEGs and GSEA result of Sertoli cells related to Fig. 2. *P* value was

calculated by permutation test.
