# Supplementary material for: Targeting APLN/APJ restores blood-testis barrier and improves spermatogenesis in murine and human diabetic models
Source: PubMed Central journal article supplement (PMC9705293; doi:10.1038/s41467-022-34990-3), 2022-11-28
Supplement: 41467_2022_34990_MOESM5_ESM.pdf [file 41467_2022_34990_MOESM5_ESM.pdf]

## Reporting Summary

Nature Portfolio wishes to improve the reproducibility of the work that we publish. This form provides structure for consistency and transparency in reporting. For further information on Nature Portfolio policies, see our [Editorial Policies](#) and the [Editorial Policy Checklist](#).

### Statistics

For all statistical analyses, confirm that the following items are present in the figure legend, table legend, main text, or Methods section.

n/a Confirmed

- The exact sample size ( $n$ ) for each experimental group/condition, given as a discrete number and unit of measurement
- A statement on whether measurements were taken from distinct samples or whether the same sample was measured repeatedly
- The statistical test(s) used AND whether they are one- or two-sided  
*Only common tests should be described solely by name; describe more complex techniques in the Methods section.*
- A description of all covariates tested
- A description of any assumptions or corrections, such as tests of normality and adjustment for multiple comparisons
- A full description of the statistical parameters including central tendency (e.g. means) or other basic estimates (e.g. regression coefficient) AND variation (e.g. standard deviation) or associated estimates of uncertainty (e.g. confidence intervals)
- For null hypothesis testing, the test statistic (e.g.  $F$ ,  $t$ ,  $r$ ) with confidence intervals, effect sizes, degrees of freedom and  $P$  value noted  
*Give  $P$  values as exact values whenever suitable.*
- For Bayesian analysis, information on the choice of priors and Markov chain Monte Carlo settings
- For hierarchical and complex designs, identification of the appropriate level for tests and full reporting of outcomes
- Estimates of effect sizes (e.g. Cohen's  $d$ , Pearson's  $r$ ), indicating how they were calculated

*Our web collection on [statistics for biologists](#) contains articles on many of the points above.*

### Software and code

Policy information about [availability of computer code](#)

Data collection

The scRNA-seq, RNA-seq and CUT-Tag was performed on an Illumina Novaseq platform.  
Quantitative fluorescence analysis with imageJ.  
Flow cytometric assays were performed on CytoFLEX and analysed in FlowJo

Data analysis

R packages: Seurat (v3.0.0); Monocle3 (v0.1.3); clusterProfiler (v3.10.1); CellCall (v0.0.0.9); nichenetr (v0.1.0); ggplot2 (v3.1.1).  
Main softwares: Hisat2 (v2.1.0); HTSeq (v0.11.3); bbduk (v38.18); trimmomatic (v0.39); bowtie2 (v2.3.5.1); macs2 (v2.2.6); bedGraphToBigWig (v2.8); R (v3.5.3).  
GraphPad Prism 9.2.0, FlowJo 10.0.8, imageJ 1.8.0, CytExpert 2.4.0  
The code used in this paper is deposited at <https://github.com/YangXinyan/DM-scRNA-seq> (<https://doi.org/10.5281/zenodo.7261195>).

For manuscripts utilizing custom algorithms or software that are central to the research but not yet described in published literature, software must be made available to editors and reviewers. We strongly encourage code deposition in a community repository (e.g. GitHub). See the Nature Portfolio [guidelines for submitting code & software](#) for further information.

## Data

Policy information about [availability of data](#)

All manuscripts must include a [data availability statement](#). This statement should provide the following information, where applicable:

- Accession codes, unique identifiers, or web links for publicly available datasets
- A description of any restrictions on data availability
- For clinical datasets or third party data, please ensure that the statement adheres to our [policy](#)

Raw sequencing data for human normal testis was retrieved from Gene Expression Omnibus (GEO) under accession number GSE106487 (<https://www.ncbi.nlm.nih.gov/geo/query/acc.cgi?acc=GSE106487>). The single-cell RNA sequencing raw data from human diabetic patients' testis in this paper have been deposited in the Genome Sequence Archive in National Genomics Data Center, China National Center for Bioinformation / Beijing Institute of Genomics, Chinese Academy of Sciences (GSA-Human: HRA000976) that are publicly accessible at <https://ngdc.cncb.ac.cn/gsa-human/browse/HRA000976>. The HIF1A CUT&Tag raw data in this paper have been deposited in the Genome Sequence Archive (GSA: CRA004696) that are publicly accessible at <https://ngdc.cncb.ac.cn/gsa/browse/CRA004696>. The processed data in this paper have been deposited in the Gene Expression Omnibus (GEO) at NCBI under accession number GSE179080 (<https://www.ncbi.nlm.nih.gov/geo/query/acc.cgi?acc=GSE179080>).

## Field-specific reporting

Please select the one below that is the best fit for your research. If you are not sure, read the appropriate sections before making your selection.

- Life sciences       Behavioural & social sciences       Ecological, evolutionary & environmental sciences

For a reference copy of the document with all sections, see [nature.com/documents/nr-reporting-summary-flat.pdf](https://nature.com/documents/nr-reporting-summary-flat.pdf)

## Life sciences study design

All studies must disclose on these points even when the disclosure is negative.

### Sample size

For scRNAseq: we obtained intact seminiferous epithelium from two T2DM patients with ethics approval via testicular sperm aspiration (TESA). These two diabetic patients had complete spermatogenesis, and all cell types could be captured completely using single cell sequencing technology.  
 For immunofluorescence and seminiferous tubule in vitro culture: we obtained intact seminiferous epithelium from three obstructive azoospermia males diagnosed with diabetes and three obstructive azoospermia males with normal spermatogenesis undergoing sperm isolation surgery for in vitro fertilization with ethics approval.  
 Quantification of immunofluorescence: fluorescence intensity values of more than 50 positive cells in at least 5 fields of view were counted in normal and diabetic patients' testicular paraffin sections.  
 Blood testis barrier integrity assay: C57BL/6N or db/db mice were randomly divided into three groups. Statistics were performed in n from a minimum of 4 to a maximum of 6 mouse testes each group.

### Data exclusions

We exclude the cells that failed quality control and explicitly define all filter criteria in the Methods.

### Replication

At least three independent biological replicates were performed for each development stages in spermatogenesis.

### Randomization

Single cells of collected samples were randomly picked with mouth pipette, and library preparation and sequencing was randomized to avoid batch effects. All single cells were allocated into different groups according to their development stages in spermatogenesis.  
 For blood testis barrier integrity assay, C57BL/6N or db/db mice were randomly divided into three groups.  
 Quantification of immunofluorescence is grouped statistics according to the treatment.

### Blinding

Investigators were blinded to group allocation during analysis of staining

## Reporting for specific materials, systems and methods

We require information from authors about some types of materials, experimental systems and methods used in many studies. Here, indicate whether each material, system or method listed is relevant to your study. If you are not sure if a list item applies to your research, read the appropriate section before selecting a response.

## Materials &amp; experimental systems

## Methods

| n/a                                 | Involved in the study                                           |
|-------------------------------------|-----------------------------------------------------------------|
| <input type="checkbox"/>            | <input checked="" type="checkbox"/> Antibodies                  |
| <input type="checkbox"/>            | <input checked="" type="checkbox"/> Eukaryotic cell lines       |
| <input checked="" type="checkbox"/> | <input type="checkbox"/> Palaeontology and archaeology          |
| <input type="checkbox"/>            | <input checked="" type="checkbox"/> Animals and other organisms |
| <input type="checkbox"/>            | <input checked="" type="checkbox"/> Human research participants |
| <input checked="" type="checkbox"/> | <input type="checkbox"/> Clinical data                          |
| <input checked="" type="checkbox"/> | <input type="checkbox"/> Dual use research of concern           |

| n/a                                 | Involved in the study                              |
|-------------------------------------|----------------------------------------------------|
| <input type="checkbox"/>            | <input checked="" type="checkbox"/> ChIP-seq       |
| <input type="checkbox"/>            | <input checked="" type="checkbox"/> Flow cytometry |
| <input checked="" type="checkbox"/> | <input type="checkbox"/> MRI-based neuroimaging    |

## Antibodies

## Antibodies used

For immunofluorescence, commercial primary antibodies were used:  
 rabbit-anti-CX43 (1:200, Abcam, ab217676, EPR21153, ),  
 rabbit-anti-ZO-1 (1:400, Abcam, ab221547, EPR19945-296, RRID:AB\_2892660),  
 rabbit-anti-CDH2 (1:100, Abcam, ab18203, RRID:AB\_444317),  
 rabbit-anti-NCAM1 (1:100, Abcam, ab220360, EPR21827),  
 rabbit-anti-HIF1A (1:50, Proteintech, 20960-1-AP, RRID:AB\_10732601),  
 mouse-anti-ACTB (1:400, Proteintech, 66009-1-Ig, RRID:AB\_2687938 ),  
 mouse-anti-VIMENTIN (1:50, Proteintech, 60330-1-Ig, RRID:AB\_2881439),  
 mouse anti-DDX4 (1:500, Abcam, ab27591, mAbcam27591, RRID:AB\_11139638),  
 rabbit anti-SOX9 (1:200, Millipore, AB5535, RRID:AB\_2239761),  
 rabbit anti-SYCP3 (1:400, Abcam, ab15093, RRID:AB\_301639),  
 mouse anti-CREM (1:50, Santa Cruz, sc-390426),  
 rabbit anti-KIT (1:200, Abcam, ab32363, YR145, RRID:AB\_731513),  
 mouse anti-FGFR3 (1:30, Santa Cruz, sc-13121, RRID:AB\_627596),  
 rabbit anti-STRA8 (1:100, Millipore, ABN1656),  
 mouse anti- $\gamma$ H2AX (1:400, Abcam, ab26350, 9F3, RRID:AB\_470861),  
 rabbit anti-INSL3 (1:300, Novus Biologicals, NBP1-81223, RRID:AB\_11030510).  
 For WB, commercial primary antibodies were used:  
 rabbit-anti-CX43 (1:1000, Proteintech, 26980-1-AP, RRID:AB\_2880711),  
 rabbit-anti-ZO-1 (1:1000, Proteintech, 21773-1-AP, RRID:AB\_10733242),  
 rabbit-anti-APJ (1:1000, Proteintech, 20341-1-AP, RRID:AB\_2878676),  
 rabbit-anti-ERK1/2 (1:1000, CST, 4695T, RRID:AB\_390779),  
 rabbit-anti-pERK1/2 (1:1000, CST, 4370T, RRID:AB\_2315112),  
 rabbit-anti-AMPK $\alpha$ 1 (1:1000, CST, 5831T, RRID:AB\_10622186),  
 rabbit-anti-p-AMPK $\alpha$ 1 (1:1000, CST, 2535T, 4OH9, RRID:AB\_331250),  
 rabbit-anti-SOX11 (1:1000, Abcam, ab134107, EPR8192, RRID:AB\_2721126),  
 mouse anti-SOX9 (1:1000, Abcam, ab76997, 3C10, RRID:AB\_2194156),  
 rabbit-anti-HIF1A (1:1000, Proteintech, 20960-1-AP, RRID:AB\_10732601),  
 rabbit-anti-WT1 (1:1000, Proteintech, 12609-1-AP, RRID:AB\_2216225),  
 rabbit-anti-AR (1:1000, Proteintech, 22089-1-AP, RRID:AB\_11182176),  
 rabbit-anti-VIMENTIN (1:1000, Proteintech, 10366-1-AP, RRID:AB\_2273020),  
 rabbit-anti-HIF1 $\alpha$  (1:1000, Proteintech, 20960-1-AP)  
 mouse anti-TUBULIN (1:10000, SUNGENE, KM9007).

## Validation

Validation information was provided by manufacturer.  
<https://www.abcam.cn/connexin-43-gja1-antibody-epr21153-ab217676.html>  
<https://www.abcam.cn/zo1-tight-junction-protein-antibody-epr19945-296-ab221547.html>  
<https://www.abcam.cn/n-cadherin-antibody-intercellular-junction-marker-ab18203.html>  
<https://www.abcam.cn/ncam1-antibody-epr21827-ab220360.html>  
<https://www.ptgcn.com/products/HIF1A-Antibody-20960-1-AP.htm>  
<https://www.ptgcn.com/products/Pan-Actin-Antibody-66009-1-Ig.htm>  
<https://www.ptgcn.com/products/Vimentin-Antibody-60330-1-Ig.htm>  
<https://www.abcam.cn/ddx4-mvh-antibody-mabcam27591-ab27591.html>  
[https://www.merckmillipore.com/CN/zh/product/Anti-Sox9-Antibody,MM\\_NF-AB5535](https://www.merckmillipore.com/CN/zh/product/Anti-Sox9-Antibody,MM_NF-AB5535)  
<https://www.abcam.cn/scp3-antibody-ab15093.html>  
<https://www.scbt.com/p/crem-antibody-c-2?requestFrom=search>  
<https://www.abcam.cn/c-kit-antibody-yr145-ab32363.html>  
<https://www.scbt.com/p/fgfr-3-antibody-b-9?requestFrom=search>  
[https://www.merckmillipore.com/CN/zh/product/Anti-Stra8-Antibody,MM\\_NF-ABN1656](https://www.merckmillipore.com/CN/zh/product/Anti-Stra8-Antibody,MM_NF-ABN1656)  
<https://www.abcam.cn/gamma-h2ax-phospho-s139-antibody-9f3-ab26350.html>  
[https://www.novusbio.com/products/insl3-antibody\\_nbp1-81223](https://www.novusbio.com/products/insl3-antibody_nbp1-81223)  
 WB  
<https://www.ptgcn.com/products/Connexin-43-Antibody-26980-1-AP.htm>  
<https://www.ptgcn.com/products/ZO1-Antibody-21773-1-AP.htm>  
<https://www.ptgcn.com/products/APLNR-Antibody-20341-1-AP.htm>  
[https://www.cellsignal.cn/products/primary-antibodies/p44-42-mapk-erk1-2-137f5-rabbit-mab/4695?site-search-type=Products&N=4294956287&Ntt=4695t&fromPage=plp&\\_requestid=6020973](https://www.cellsignal.cn/products/primary-antibodies/p44-42-mapk-erk1-2-137f5-rabbit-mab/4695?site-search-type=Products&N=4294956287&Ntt=4695t&fromPage=plp&_requestid=6020973)  
<https://www.cellsignal.cn/products/primary-antibodies/phospho-p44-42-mapk-erk1-2-thr202-tyr204-d13-14-4e-xp-rabbit->

mab/4370?site-search-type=Products&N=4294956287&Ntt=4370t&fromPage=plp&\_requestid=6021634  
 https://www.cellsignal.cn/products/primary-antibodies/ampka-d5a2-rabbit-mab/5831?site-search-type=Products&N=4294956287&Ntt=5831t&fromPage=plp&\_requestid=6021832  
 https://www.cellsignal.cn/products/primary-antibodies/phospho-ampka-thr172-40h9-rabbit-mab/2535?site-search-type=Products&N=4294956287&Ntt=2535t&fromPage=plp&\_requestid=6022164  
 https://www.abcam.cn/sox11-antibody-epr8192-ab134107.html  
 https://www.abcam.cn/sox9-antibody-3c10-bsa-and-azide-free-ab76997.html  
 https://www.ptgcn.com/products/HIF1A-Antibody-20960-1-AP.htm  
 https://www.ptgcn.com/products/WT1-Antibody-12609-1-AP.htm  
 https://www.ptgcn.com/products/AR-Antibody-22089-1-AP.htm  
 https://www.ptgcn.com/products/VIM-Antibody-10366-1-AP.htm  
 http://www.sungenebiotech.com/index.php?m=Product&a=product\_xq&catid=2&proid=53&prid=291&pid=723&id=1566

## Eukaryotic cell lines

Policy information about [cell lines](#)

|                                                                      |                                                                                                                     |
|----------------------------------------------------------------------|---------------------------------------------------------------------------------------------------------------------|
| Cell line source(s)                                                  | The TM4 and HEK293T cell line (immortalized mouse Sertoli cells) was purchased from Procell Life Science Technology |
| Authentication                                                       | Cell identity determined correctly by STR assay                                                                     |
| Mycoplasma contamination                                             | All cell lines were test negative for Mycoplasma contamination.                                                     |
| Commonly misidentified lines<br>(See <a href="#">ICLAC</a> register) | No commonly misidentified lines were used.                                                                          |

## Animals and other organisms

Policy information about [studies involving animals](#); [ARRIVE guidelines](#) recommended for reporting animal research

|                         |                                                                                                                                                                                  |
|-------------------------|----------------------------------------------------------------------------------------------------------------------------------------------------------------------------------|
| Laboratory animals      | 4 week male C57BL/6N mice purchased from Southern Medical University Laboratory Animal Center and 8 week male db/db mice were purchased from Cavens Experimental Animal Co., Ltd |
| Wild animals            | This study didn't involve wild animals.                                                                                                                                          |
| Field-collected samples | This study didn't involve field-collected samples.                                                                                                                               |
| Ethics oversight        | All animal studies were performed in accordance with the ethical guidelines of South Medical University ethics committee (L2016149).                                             |

Note that full information on the approval of the study protocol must also be provided in the manuscript.

## Human research participants

Policy information about [studies involving human research participants](#)

|                            |                                                                                                                                                                                                                                                                                                                                                                                                                                                                                                                                                                                                                                                                                                          |
|----------------------------|----------------------------------------------------------------------------------------------------------------------------------------------------------------------------------------------------------------------------------------------------------------------------------------------------------------------------------------------------------------------------------------------------------------------------------------------------------------------------------------------------------------------------------------------------------------------------------------------------------------------------------------------------------------------------------------------------------|
| Population characteristics | Adult human testicular samples were obtained from obstructive azoospermia males diagnosed with T2DM undergoing sperm isolation surgery and obstructive azoospermia males with normal spermatogenesis undergoing sperm isolation surgery for in vitro fertilization.                                                                                                                                                                                                                                                                                                                                                                                                                                      |
| Recruitment                | Adult human testicular samples for single-cell RNA sequencing analysis were obtained from two obstructive azoospermia males diagnosed with diabetes (DM1: 42 years old; DM2: 34 years old) undergoing sperm isolation surgery for in vitro fertilization. Adult human testicular samples for immunofluorescence and seminiferous tubule in vitro culture were obtained from three obstructive azoospermia males diagnosed with T2DM and three obstructive azoospermia males with normal spermatogenesis undergoing sperm isolation surgery for in vitro fertilization. All patients signed informed consent forms and voluntarily donated testicular tissue for this study. There was no selection bias. |
| Ethics oversight           | The experiments performed in this study were approved by Third Affiliated Hospital of Guangzhou Medical University (2017-055). The study was performed according to the guidelines of the ethics committee at the third Affiliated Hospital of Guangzhou Medical University. The study design and conduct complied with all relevant regulations regarding the use of human study participants and was conducted in accordance with the criteria set by the Declaration of Helsinki.                                                                                                                                                                                                                     |

Note that full information on the approval of the study protocol must also be provided in the manuscript.

## ChIP-seq

### Data deposition

- Confirm that both raw and final processed data have been deposited in a public database such as [GEO](#).
- Confirm that you have deposited or provided access to graph files (e.g. BED files) for the called peaks.

#### Data access links

*May remain private before publication.*

The accession number for the HIF1 $\alpha$  CUT&Tag raw data in this paper is GSA: CRA004696 (<https://ngdc.cncb.ac.cn/gsa/browse/CRA004696>).

The accession number for the processed data in this paper is GEO: GSE179080 (<https://www.ncbi.nlm.nih.gov/geo/query/acc.cgi?acc=GSE179080>).

#### Files in database submission

HIF1A.NC.rep1\_1.fq.gz  
 HIF1A.NC.rep1\_2.fq.gz  
 HIF1A.NC.rep2\_1.fq.gz  
 HIF1A.NC.rep2\_2.fq.gz  
 HIF1A.HG.rep1\_1.fq.gz  
 HIF1A.HG.rep1\_2.fq.gz  
 HIF1A.HG.rep2\_1.fq.gz  
 HIF1A.HG.rep2\_2.fq.gz  
 HIF1A.NC.rep1.bw  
 HIF1A.NC.rep2.bw  
 HIF1A.HG.rep1.bw  
 HIF1A.HG.rep2.bw  
 HIF1A.NC.rep1.narrowPeak  
 HIF1A.NC.rep2.narrowPeak  
 HIF1A.HG.rep1.narrowPeak  
 HIF1A.HG.rep2.narrowPeak

#### Genome browser session (e.g. [UCSC](#))

The link for reviewers to access the data is available at: <https://www.ncbi.nlm.nih.gov/geo/query/acc.cgi?acc=GSE179080>.

### Methodology

#### Replicates

Two independent biological replicates were performed in each group.

#### Sequencing depth

HIF1A.NC.rep1: 35064727(total number of reads), 25315406(uniuely mapped reads), 150bp paired-end.  
 HIF1A.NC.rep2: 28192017(total number of reads), 21617276(uniuely mapped reads), 150bp paired-end.  
 HIF1A.HG.rep1: 28503774(total number of reads), 21929364(uniuely mapped reads), 150bp paired-end.  
 HIF1A.HG.rep2: 26492849(total number of reads), 20663545(uniuely mapped reads), 150bp paired-end.

#### Antibodies

rabbit-anti-HIF1 $\alpha$  (1:50, Proteintech, 20960-1-AP, Lot:00096129)

#### Peak calling parameters

mapping: bowtie2 -q --phred33 --very-sensitive --end-to-end -p 2 --reorder -x Mus\_musculus.GRCm38.Ensembl.genome -1 Read1.fq.gz -2 Read2.fq.gz -S sample.sam  
 peak calling: macs2 callpeak --verbose 3 -t sample.bam -n sample -g mm -f BAMPE --cutoff-analysis -B --call-summits

#### Data quality

The q-value (minimum FDR) cutoff 0.05 is used to call significant regions. The four samples of HIF1A.NC.rep1, HIF1A.NC.rep2, HIF1A.HG.rep1, HIF1A.HG.rep2 have 64345, 62154, 77906, 74286 peak which FDR values less than 0.05, respectively. And they have 16492, 16436, 22921, 22348 peak fold-change is greater than 5, respectively.

#### Software

Main softwares: bbdudk (v38.18); trimmomatic (v0.39); bowtie2 (v2.3.5.1); macs2 (v2.2.6); bedGraphToBigWig (v2.8).

## Flow Cytometry

### Plots

Confirm that:

- The axis labels state the marker and fluorochrome used (e.g. CD4-FITC).
- The axis scales are clearly visible. Include numbers along axes only for bottom left plot of group (a 'group' is an analysis of identical markers).
- All plots are contour plots with outliers or pseudocolor plots.
- A numerical value for number of cells or percentage (with statistics) is provided.

### Methodology

#### Sample preparation

We used Annexin V-FITC/PI to detect cell apoptosis. Cells from different treatments were digested and resuspended followed by three times washes using PBS then then stained with Annexin V- FITC/PI (Vazyme, A211-01) for 15 minutes at 37°C in

|                           |                                                                                                                                                                                                                                                                                                                                          |
|---------------------------|------------------------------------------------------------------------------------------------------------------------------------------------------------------------------------------------------------------------------------------------------------------------------------------------------------------------------------------|
|                           | Binding buffer. After adding 4 times the volume of Binding buffer, the flow cytometry can be performed directly. For cell ROS Measuring, TM4 cell were incubated with 2.5 $\mu\text{mol/L}$ DHE (Macklin, D807594) for 25 min in the dark at 37°C and washed two time with PBS and then red fluorescence was detected by flow cytometry. |
| Instrument                | All flow cytometric assays were performed on CytoFLEX (Beckman)                                                                                                                                                                                                                                                                          |
| Software                  | CytExpert 1.2.11.0 (Beckman) was used to analysis FACS data                                                                                                                                                                                                                                                                              |
| Cell population abundance | The FACS experiments in this paper do not involve cell purity                                                                                                                                                                                                                                                                            |
| Gating strategy           | Cell debris was first discarded on the basis of FSC-A and SSC. For apoptosis, we consider FITC+/ PI+ cells as late apoptotic cells and FITC+/PI- as early apoptotic cells. For cell ROS Measuring, when the FL2-H::PE-H channel intensity is greater than $10^4$ , we determine that it is high ROS.                                     |

Tick this box to confirm that a figure exemplifying the gating strategy is provided in the Supplementary Information.
